# **Stabilization of cultural innovations depends on population density: testing an epidemiological model of cultural evolution against a global dataset of rock art sites and climate-based estimates of ancient population densities.**

## **Short title: Cultural epidemiology: the case of rock art**

**Authors:** Richard Walker<sup>\*†1</sup>, Anders Eriksson<sup>\*†2</sup>, Camille Ruiz<sup>3</sup>, Taylor Howard Newton<sup>1</sup>,  
Francesco Casalegno<sup>1</sup>

## **Affiliations**

<sup>1</sup> Blue Brain Project, Ecole Polytechnique Fédérale de Lausanne, Switzerland

<sup>2</sup> Department of Medical and Molecular Genetics, Kings College, London, UK

<sup>3</sup> Ateneo de Manila University, Manila, The Philippines

†Joint first authors

\*Correspondance : [richard.walker@epfl.ch](mailto:richard.walker@epfl.ch), [anders.eriksson@kcl.ac.uk](mailto:anders.eriksson@kcl.ac.uk)

## **Abstract**

Demographic models of human cultural evolution have high explanatory potential but weak empirical support. Here we use a global dataset of rock art sites and climate and genetics-based estimates of ancient population densities to test a new model based on epidemiological principles. The model focuses on the process whereby a cultural innovation becomes endemic in a population. It predicts that this cannot occur unless population density exceeds a critical value. Analysis of the data, using a Bayesian statistical framework, shows that the model has stronger empirical support than a null model, where rock art detection rates and population density are independent, or a proportional model where detection is directly proportional to population density. Comparisons between results for different geographical areas and periods yield qualitatively similar results, supporting the robustness of the model. Re-analysis of the rock art data, using a second set of independent population estimates, yields similar results. We conclude that population density above a critical threshold is a necessary condition for the maintenance of rock art as a stable part of a population's cultural repertoire. Methods similar to those described can be used to test the model for other classes of archaeological artifact and to compare it against other models.

## **Introduction**

It is widely accepted that the complexity and diversity of human cultures are a result of Cumulative Cultural Evolution (CCE), enabled by humans' unique neuroanatomy and cognitive capabilities, especially their skills in "cultural learning" [1–3]. However, the old idea that modern human capabilities emerged suddenly as a result of an advantageous mutation some 50,000 years ago [4,5] is no longer accepted and many allegedly modern features of human behavior and cognition are now believed to be more ancient than previously suspected [6–9]. There is, furthermore, no evidence that variations in brain size, brain morphology or innate capabilities explain any aspect of the spatiotemporal patterning of human cultural evolution over the last 50,000 years. Against this background, demographic models of CCE [10] assign a determining role to variations in population size, density and structure. Such models suggest that larger, denser, better connected

populations produce more, more complex innovations than smaller ones [11], are less vulnerable to stochastic loss of unique skills [12,13], and are more capable of exploiting beneficial transmission errors during social learning [14]. They also suggest that well-connected metapopulations produce faster cultural innovation than metapopulations with weaker connections among subpopulations [15].

Demographic models could potentially provide valuable explanations for spatiotemporal patterning in the global archaeological record and several authors have used them for this purpose e.g. [14,16]. However, the assumptions and conclusions of the models are hotly contested [17–19]. Empirical studies are sparse and inconclusive, with some supporting an important role for demography (e.g. [14,15,20,21]), while others find no evidence for such a role [22–26].

In general, previous empirical studies have focused on the complexity of the broad classes of technology (e.g. food gathering technology) available to historical or recently extinct hunter-gatherer populations from specific geographical regions. Here, by contrast, we test the ability of a model to predict the global, spatiotemporal distribution of a single class of artifact (parietal rock art) over a period of 46,300 years.

## Results and discussion

### The model

CCE involves the inception, diffusion and selective retention of cultural innovations (e.g. innovations in social practices, beliefs, and technologies). In the process, a subset of the innovations become *endemic* – providing a stable foundation for future innovation.

In this study, we consider the case of parietal rock art. The model tested here (see Fig 1), inspired by SIR models in epidemiology [27–29], focuses on the process whereby an innovation becomes a permanent feature of a community’s cultural repertoire. We treat this process as analogous to the way a disease becomes endemic in a population [30].

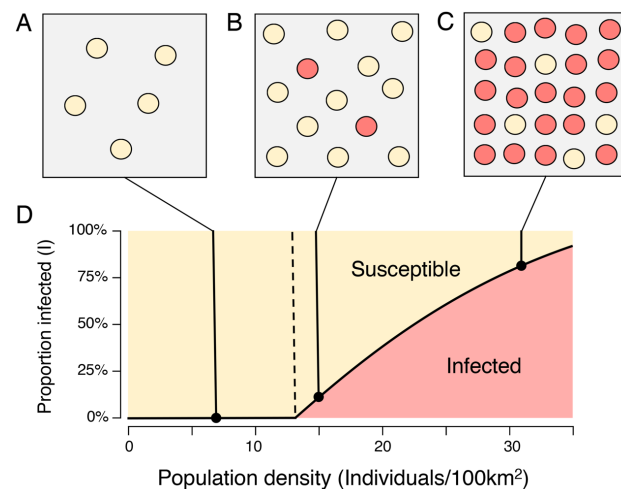

**Fig 1.** The epidemiological model. As population density increases, opportunities for transmission between subpopulations also increase. A: Below the critical threshold  $\rho^*$ , the innovation is rapidly extinguished. B-C: Above the critical threshold, the proportion of infected subpopulations is an increasing function of population density.

Consider the emergence of rock art in a metapopulation comprising  $N$  subpopulations or communities, where  $I$  and  $S$  are respectively the proportion of infected communities (communities that have adopted the innovation), and susceptible communities (communities that have not). The innovation is transmitted from infected to susceptible communities at rate  $\beta$ . By analogy with empirical findings in [31] (see Methods), rates of encounter between communities are assumed proportional to the square root of population density. Infected communities recover (here: lose the ability or the propensity to produce rock art) at rate  $\gamma$ . As envisaged in [12,13], small communities, where only a few individuals possess a given skill, are particularly vulnerable to such losses.

In this model (see Fig 1 and Methods), there is a critical population density:

$$\rho^* = \left(\frac{\gamma}{\beta}\right)^2$$

such that

$$I^* = \begin{cases} 0, & \rho \leq \rho^* \\ 1 - \sqrt{\frac{\rho^*}{\rho}}, & \rho > \rho^* \end{cases}$$

The value of  $\rho^*$  is determined by the equilibrium between the rate of transmission,  $\beta$ , and the rate of recovery,  $\gamma$ . Below  $\rho^*$ , no communities are permanently infected. Above  $\rho^*$ , the innovation spreads from community to community until the number of infected communities is equal to  $I^*$ : in other words, it becomes *endemic*: even when a particular subpopulation loses the innovation it can reacquire it from other subpopulations where it has been retained. Examples of the loss and subsequent reacquisition of lost technologies are well-attested in the anthropological literature (see for example the reported loss and reintroduction of kayak-building skills among the Iniguit people [32,33]). The analogy with endemic disease is clear.

$I^*$  is not directly observable in the archaeological record. To test our model, we therefore consider the *site detection rate* i.e. the probability,  $P$ , that a single cell in a hexagonal lattice of equally sized cells covering the surface of the globe, contains at least one recorded instance of rock art. Since the proportion of cells where geology, climate and research effort allow the creation, preservation and recording of rock art is small,

$$P \cong \zeta I^* \rho$$

where  $\zeta$  reflects the joint effects of these factors (see SI). The model predicts that for  $\rho \leq \rho^*$ , detection rates will be zero and that at higher densities it will rise approximately in direct proportion to  $\rho$ . As a result, the distribution of population densities for cells containing rock art will differ significantly from the distribution for all cells. Similarly, the median population density for cells containing sites will be automatically higher than for the complete set of cells.

## Testing the model

### Assumptions and strategy

Our analysis is based on the assumption that an innovation that does not become endemic is statistically unlikely to contribute to CCE or to leave a trace in the archaeological record. If this is

correct, most known rock art will originate in locations and periods where rock art was once endemic. The model predicts that all such sites will be located in territories whose population density exceeds a critical threshold.

To test these predictions, we collated a dataset containing the locations, dates and other characteristics of 133 scientifically dated rock art sites (see Fig 2A, SI Table 1, Methods). Uncalibrated radiocarbon dates in the dataset were calibrated using Calib 7.0 [34] with the IntCal 13 calibration curve. Fig 2B shows the resulting age distribution. Ancient population densities were estimated by combining data from two published models, informed by global genetic variation, and climate-based estimates of Net Primary Productivity [35,36] (See Methods). Using the results from these models, and applying the same methods, we represented the distribution of population densities in time and space on a lattice of *cells*, each approximately 100 km wide, and each associated with a date. Cells containing at least one example of dated rock art were defined as *sites*. In the subsequent analysis, we filtered this initial data set to include only cells lying at latitudes between 20-60°N and 10-40°S, and with dates more recent than 46,300 years ago - the only latitudes and dates with significant numbers of sites in our rock art dataset. Cells with inferred population densities of zero were also eliminated. This process led to the exclusion of 4 sites at equatorial latitudes, 1 site older than 46,300 years and 8 sites with inferred population densities of zero. After filtering, the final dataset included 9.8 million cells containing 119 rock art sites.

Using this dataset, we computed the distribution of population densities for sites and for all cells (Figure 2C). On this basis, we calculated site detection rates (number of sites / total number of cells) for each population density bin.

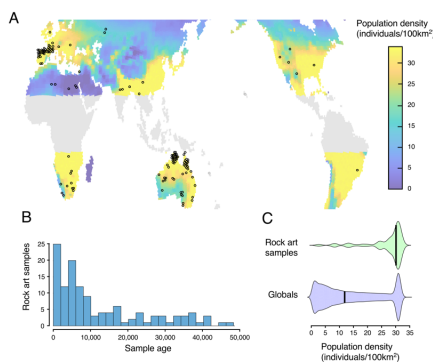

**Fig 2.** Sites used in the analysis: A: Geographical distribution of sites (all 133 sites) and inferred population distributions (maximum value over the last 46,300 years, see color bar for scale; areas excluded from the analysis shown in grey). B: Distribution by earliest date of rock art at site location (119 sites included in analysis). C: Comparison of population densities for sites vs. all cells (119 sites included in analysis).

## Empirical support for the model

### Full dataset

As a first test of the model, we analyzed population densities for our complete rock art dataset (119 sites). As predicted, the distribution of population densities for sites differed significantly from the

distribution for all cells (two sample KS test  $D=0.58$ ,  $p<0.0001$ ), the proportion of sites in cells with low population densities was much lower than the proportion of all cells, and the proportion in cells with high densities was much higher (median population densities: Sites:  $29.77/100\text{km}^2$ ; All cells  $15.29/100\text{km}^2$ , Mann-Whitney  $U=327$ ,  $p<0.01$ ) (See Table 1 for detailed results).

Using a Bayesian statistical framework, we estimated the most likely parameter values for the model given the empirical observations (Fig 3A). Posterior distributions for model parameters were tightly constrained (see SI Fig 1). The inferred critical population density for the model with the highest likelihood, was  $12.27$  individuals/ $100\text{km}^2$  (95% CI:  $7.36 - 16.64$ ) (Fig 3B). Comparison of the model against a constant model (equal site frequency at all population densities) strongly supported rejection of the alternative model. Comparison against a proportional model, where detection rates were directly proportional to population density (i.e. to the number of potential inventors in the population) (compare with [11]), again supported the superiority of the epidemiological model. (for detailed results see Table 1). Taken together, these findings support the hypothesis that endemic production of rock art requires population density above a critical value.

| Analysis                                 | Eriksson  | Eriksson exact direct dates (calibrated by original authors) | Timmermann | Australia | France-Spain | 0 – 9,999 years ago | 10,000-46,300 years ago |
|------------------------------------------|-----------|--------------------------------------------------------------|------------|-----------|--------------|---------------------|-------------------------|
| N sites                                  | 119       | 37                                                           | 93         | 56        | 31           | 74                  | 45                      |
| N. cells                                 | 9,817,159 | 9,817,159                                                    | 213,207    | 1,223,500 | 242,009      | 2,672,852           | 7,144,307               |
| Median population density sites          | 29.77     | 30.30                                                        | 25.04      | 30.28     | 28.23        | 30.34               | 27.04                   |
| Median population density all cells      | 15.29     | 15.29                                                        | 18.04      | 21.50     | 26.60        | 19.92               | 13.65                   |
| KS D                                     | 0.58      | 0.73                                                         | 0.54       | 0.64      | 0.68         | 0.76                | 0.45                    |
| KS p                                     | 0.000016  | 0.000000                                                     | 0.000336   | 0.000001  | 0.000000     | 0.000000            | 0.000132                |
| Mann-Whitney U                           | 327.00    | 241.00                                                       | 236.00     | 245.00    | 261.00       | 205.00              | 403.00                  |
| Mann-Whitney p                           | 0.002600  | 0.000034                                                     | 0.005337   | 0.000048  | 0.000830     | 0.000005            | 0.034209                |
| Threshold CI 0.025                       | 7.36      | 9.64                                                         | 12.80      | 11.84     | 0.11         | 8.96                | 0.92                    |
| Threshold CI 0.25                        | 10.72     | 13.76                                                        | 15.64      | 17.30     | 6.23         | 13.18               | 4.26                    |
| Threshold CI 0.5                         | 12.27     | 15.41                                                        | 17.19      | 26.81     | 14.12        | 15.03               | 6.83                    |
| Threshold CI 0.75                        | 14.05     | 16.77                                                        | 18.94      | 28.00     | 18.56        | 16.53               | 9.53                    |
| Threshold CI 0.975                       | 16.64     | 18.65                                                        | 21.79      | 28.90     | 32.83        | 18.82               | 14.53                   |
| Log Likelihood                           | -1404     | -467                                                         | -791       | -593      | -303         | -820                | -560                    |
| Bayes Factor (w.r.t. proportional model) | 1.07E+05  | 1.54E+05                                                     | 2.55E+03   | 1.47E+04  | 2.00E+01     | 3.88E+03            | 3.49E+01                |
| Bayes Factor (w.r.t. Constant model)     | 9.79E+26  | 6.33E+13                                                     | 2.22E+09   | 8.72E+09  | 2.47E+02     | 2.29E+13            | 1.50E+10                |

**Table 1:** Summary of statistical results for the analyses described in the text

The Kolmogorov-Smirnov test tests the null hypothesis that the distribution of population densities for *sites* does not differ significantly from the distribution for all cells. The Mann-Whitney test (which is less sensitive) tests for differences between the medians. Threshold CIs show the inferred confidence intervals for the threshold, given the empirical data. Log likelihood shows the log likelihood of the model, given the empirical data. The two Bayes factors show the ratio of the marginal likelihood of the epidemiological model to the marginal likelihood of alternative models (see Methods)

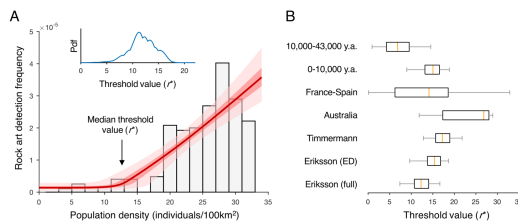

**Fig 3.** Empirical support for the epidemiological model. A. Inferred detection frequencies given the epidemiological model, the full archaeological dataset, and the combined population estimates from [35,36] (see Methods). Grey bars: Empirical frequencies of rock art in different intervals of population density. Red line: Estimated rock art detection rate as a function of population density (median of posterior distribution of estimated detection rate, with interquartile range in dark pink and 95% CI in pale pink). Also shown is the posterior probability density function (pdf) of the threshold value ( $\rho^*$ , inset); the median value of this distribution is indicated by an arrow on the main axis. B. Inferred values of the critical threshold for the different analyses described in the paper (ED: exact direct; orange line: maximum likelihood estimate; box: interquartile range; whiskers: CI 0.025-0.975).

## Sensitivity to potential dating errors

Eight sites in the rock art dataset were located in cells with estimated population densities below the critical value inferred from the model and the empirical data. As described in the Methods section, some of the dates in our rock art dataset were minimum or maximum dates, and some were estimated using indirect methods (e.g. dating of organic materials stratigraphically associated with the art). Additionally, some radiocarbon dates (mainly from the older literature) were not calibrated or came from papers that did not report their calibration status. Since these dates do not necessarily reflect the actual dates at which the art appeared, and correct inference of population densities requires correct dates, we repeated our analysis using only sites with “high quality” dates, i.e. exact dates obtained with direct methods, and, in the case of radiocarbon dates, dates calibrated by the original authors.

In this filtered dataset, all sites (37/37) had population densities higher than the inferred critical population density (see below). This finding matches the predictions of the model and suggests that the unexpectedly high inferred population densities for some of the sites in the original dataset, may have been due to erroneous dating. As in the original analysis, the distributions of population densities for sites differed significantly from the distribution for all cells (Two sample KS test  $D=0.73$ ,  $p<0.00001$ ), median population density for sites was higher than for all cells (Sites: 30.30; All cells 15.29, Mann-Whitney  $U=241$ ,  $p<0.0001$ ) and, empirical support for the epidemiological model was much stronger than for alternative models (see Table 1). The 95% CI for the inferred critical population density (15.41 individuals/100km<sup>2</sup>, 95% CI: 9.64-18.65) overlapped with the estimate for the complete dataset (see Figure 3B, Table 1).

## Alternative population estimates

Another potential source of errors was the model used to generate our population estimates. We therefore repeated our analyses using more recent population estimates [37], based on a different climate model and different assumptions (see Methods). As in the earlier analysis, there were significant differences between the population density distributions for sites and all cells, (two sample KS-test  $D=0.54$ ,  $p<0.001$ ), median inferred population was higher for sites than for all cells

(sites: 25.04; all cells: 18.04, Mann-Whitney  $U=236$ ,  $p<0.01$ ) and empirical support for the epidemiological model was much stronger than for the alternative null or proportional models (see Table 1). The CI for the inferred critical population density (95% CI: 12.8-21.79) overlapped with the CI for the original analysis (see Fig 3B, Table 1)

### **Potential sample bias**

A comprehensive survey of the vast rock art literature was beyond the scope of our study. As a result, large geographical areas in Central/South America, Central Africa, East and South-East Asia are practically unrepresented in our dataset (see Fig 2A). Moreover, 60.1% of the sites in our full dataset date from less than 10,000 years ago, and only 3.9% from before 40,000 years ago (see Fig 2C). All this suggests the possibility of systematic bias. Suggestions that the literature itself is biased by ecological and taphonomic factors and by geographical variations in research effort [38] make the presence of such biases even more plausible.

To test the potential impact of such biases, we repeated our analysis for data from two culturally unrelated geographical areas (the territory covered by the modern countries of France and Spain, and Australia) and for two distinct periods (from the present until 10,000 years ago, and from 10,000 until 46,300 years ago (see Methods). In the case of France-Spain, it was not possible to test the prediction of a critical threshold because nearly all cells had relatively high inferred population densities. The other three analyses supported the existence of such a threshold. All four analyses found different density distributions for sites and for all cells, higher median population densities for sites than for all cells, and stronger support for the epidemiological model than for alternative models (Fig 3B, Table 1). The convergence of results for different periods and geographical areas is evidence that the overall results of our analysis are not due to sampling biases (differences in sampling rates between periods or areas).

### **Population density as a proxy for social contacts**

Another potential problem was the use of population density as a proxy for contacts between subpopulations. Grove suggests that individual encounter rates depend not on population density but on the product of density and mobility [31]. However empirical results included in the same paper show that, in reality, the mobility of modern hunter gatherers is inversely proportional to the square root of population density. If this is correct, the encounter-rate will be directly proportional to the square root of population density. This is the assumption on which we based our model. Testing with a generalized model (results not shown) demonstrated the robustness of our qualitative findings to the exact specification of this relationship (Methods).

## **Conclusions**

This study models one of the key mechanisms required for CCE (the process whereby an innovation becomes endemic in a population), and tests the predictions of the model for the case of parietal rock art. In all our analyses, (Fig 3B, Table 1), the distribution of population densities for sites differs significantly from the distribution for all cells and median population densities for sites (25-30 individuals/km<sup>2</sup>) are consistently higher. In all cases, empirical support for the epidemiological model and a critical population density is much stronger than for alternative proportional or null models. Taken together, these results provide robust grounds to reject the null



hypothesis that the emergence of rock art is unrelated to demography, and strong support for our model i.e. for the hypothesis that population density above a critical value is a *necessary* condition for an innovation to become endemic in a population.

Importantly, nothing in our model or empirical results suggests that a minimum level of population density is a *sufficient* condition for the emergence of rock art. Our model represents a single aspect of Cultural Evolution – namely, the process whereby an innovation becomes endemic in a population. We thus consider our model as complementary to the demographic models of the social transmission and selective retention of cultural innovations, reviewed in the Introduction. It is certain, furthermore, that rates of preservation and detection of rock art are strongly dependent on climatic and geological factors, and on variations in research effort. It is not surprising, therefore, that many areas of the globe (e.g. in equatorial Africa) with high inferred population densities for the relevant periods, have little or no reported rock art.

Previous demographic models have posited a relationship between cultural evolution and the overall size of so-called Culturally Effective Populations, networks of cultural exchange spanning potentially large geographical areas. The theoretical arguments for this relationship are strong. However, in archaeological contexts where a local population’s cultural links to other populations are unknown, the size of “culturally effective populations” is hard to estimate [12]. One of the key methodological features of our study is the use of population density as the independent variable. Since population densities are easier to estimate than culturally effective population sizes, this greatly facilitates the process of theory testing. A second key feature is the choice of “detection frequency” as the dependent variable. In the majority of current studies the dependent variable is “cultural complexity”, usually represented by the size of the population’s toolkit [39]. The method used here circumvents the difficulty of applying such a concept in archaeological settings, where complete toolkits are rarely available. These methodological features of our study will facilitate the application of our model and methods outside the case of rock art and in contexts where other constructs are difficult to measure.

Our rock art dataset, population estimates, and software tools are publicly available at <https://github.com/rwalker1501/cultural-epidemiology.git>. Other researchers are encouraged to use them to replicate our findings, to test our hypotheses for other classes of artifact and with other population estimates, and to explore their own models.

## Methods

### Derivation of the model

The model describes the diffusion of a cultural innovation through a Culturally Effective Population (CEP) [12] i.e. a closed network of communicating individuals or subpopulations. Notation for the “disease dynamics” follows the conventions established in [29].

Consider a CEP with stable number of subpopulations,  $N$ . Assume that the population is divided into infected and susceptible (unaffected) subpopulations, with proportions  $I$  and  $S$ , respectively, such that  $I + S = 1$ . If the population is “well-mixed” (i.e. every subpopulation is in social contact with every other subpopulation), any infected subpopulation can transmit the innovation to any susceptible subpopulation. Let  $\beta$  be the rate of transmission per time step and  $\gamma$  the rate of recovery

of the infected subpopulation (here: the rate at which it loses the ability to produce rock art). Thus, the rate of change in the proportion of infected subpopulations is given by

$$\frac{dI}{dt} = \beta NIS - \gamma I \quad (1)$$

In a partially connected population, infected subpopulations can only transmit an innovation to the susceptible subpopulations with which it is in contact. Assuming that on average each subpopulation is in contact with  $k$  other sub-populations, we can substitute  $k$  for  $N$  in Eq. (1). Using  $S+I=1$ , we thus obtain

$$\frac{dI}{dt} = \beta kI(1 - I) - \gamma I \quad (5)$$

Rearranging, solving for  $\frac{dI}{dt} = 0$ , and imposing  $I^* \geq 0$ , we obtain the stable proportion of infected subpopulations:

$$I^* = \begin{cases} 0, & 1 - \frac{\gamma}{k\beta} \leq 0 \\ \left(1 - \frac{\lambda}{k\beta}\right), & 1 - \frac{\gamma}{k\beta} > 0 \end{cases} \quad (6)$$

If social contact numbers  $k$  are proportional to the square root of density [31], i.e.  $k = \alpha\sqrt{\rho}$ ,

$$I^* = \begin{cases} 0, & 1 - \frac{\gamma}{\alpha\beta\sqrt{\rho}} \leq 0 \\ 1 - \frac{\gamma}{\alpha\beta\sqrt{\rho}}, & 1 - \frac{\gamma}{\alpha\beta\sqrt{\rho}} > 0 \end{cases} \quad (7)$$

In short, there exists a critical population density,  $\rho^*$ , such that at densities below  $\rho^*$  there are no infected subpopulations, and at densities above  $\rho^*$ , the number of infected subpopulations is greater than zero.

At  $\rho^*$ ,  $1 - \frac{\gamma}{\alpha\beta\sqrt{\rho}} = 0$ . Thus:

$$\rho^* = \left(\frac{\gamma}{\alpha\beta}\right)^2 \quad (8)$$

To reduce the number of parameters in the model, we normalize the rate of transmission, setting  $\alpha\beta$  to 1. We thus obtain the simplified expressions:

$$\rho^* = \gamma^2 \quad (9)$$

and

$$I^* = \begin{cases} 0, & \rho \leq \rho^* \\ 1 - \sqrt{\frac{\rho^*}{\rho}}, & \rho > \rho^* \end{cases} \quad (10)$$

In this simplified version of the model, the equilibrium size of the infected population and the critical value of  $\rho$  are entirely dependent on population density and a single parameter,  $\gamma$ .

Finally, we assume that each infected subpopulation has an equal probability,  $z$ , of producing an artifact that produces a trace in the archaeological record. On this assumption, the probability  $P$ , that the  $n$  infected subpopulations will generate at least one such trace, is given by:

$$P = (1 - (1 - zI^*)^N) \quad (11)$$

Assuming  $z$  is small,

$$P \cong zI^*N \quad (12)$$

The value of  $N$  for a cell of standard area, with fixed mean community size, is proportional to the population density for the cell:

$$N = \mu\rho \quad (13)$$

Grouping  $\mu$  and  $z$  in a single variable  $\zeta$  we obtain

$$P \cong \zeta I^*\rho \quad (14)$$

In the setting of our empirical study, inferred population sizes may contain large errors, especially when site dates are minimum or maximum dates or indirect estimates or when the calibration status of a radiocarbon date is not clearly stated in the original article. We, therefore, include an error term  $\varepsilon$ , representing the probability that a site is attributed to a cell with an incorrect date, whose population will thus be different from that of the cell with the correct date. Thus:

$$P = (1 - \varepsilon)\zeta I^*\rho + \varepsilon \quad (15)$$

This is the model we tested in our empirical study.

## Rock art dataset

The analysis presented here is based on a dataset of parietal rock art, generated through a literature search with Google Scholar. We are aware that the database contains only a small proportion of all rock painting sites in the world, and that it may be subject to systematic biases. These are discussed in the Results and Discussion.

For the purposes of our survey, parietal rock art was defined to include all figurative and non-figurative pictograms (paintings and drawings) and petroglyphs (engravings) using rock wall as a canvas. “Portable art” (e.g. figurines) and geoglyphs (i.e. large designs or motifs on the ground) were excluded from the analysis.

The survey was seeded using the query:

("rock art" OR "parietal art" OR petroglyphs OR pictographs) [AND] (radiocarbon OR AMS OR luminescence OR Uranium).

We read the top 300 articles found by the query that were accessible through the EPFL online library, together with other relevant papers, cited within these articles. Sites where drawings, paintings and engravings were reported, were systematically recorded. Sites with no radiocarbon, optical luminescence or Uranium-Thorium date were excluded.

For each dated site, we recorded the longitude and latitude of the site (where reported), its name, the earliest and latest dates of “art” found at the site (converted to years before 1950). Where

authors reported a confidence interval for dates we used the midpoint of the confidence interval. Radiocarbon dates marked by the original authors as calibrated dates were flagged as such. The calibration status of radiocarbon dates whose calibration status was unspecified was inferred from the surrounding text and from the CIs for the dates. Dates inferred to be uncalibrated were then calibrated using Calib 7.0 [34] with the IntCal 13 calibration curve. Where different authors reported different dates for a site, without disputing dates proposed by other authors, we systematically used the dates from the most recent report. We also recorded the name of the modern country where the site was located, the journal reference, the method(s) used to produce the date, the nature of the dating procedure (direct dating, indirect dating), the nature of the data provided (exact data, minimum date, maximum date, mixed), a descriptor of the artifacts found (paintings, drawings, petroglyphs etc.), and a flag showing disputed dates.

In cases where the article did not provide a latitude and longitude, online resources were used to locate the information. The main such resources were D. Zwiefelhofer's FindLatitudeAndLongitude web site [40], which is based on Google Maps, and Austarch, a database of 14C and Luminescence Ages from Archaeological Sites in Australia, managed by A. Williams and Sean Ulm [41].

The survey generated 190 records. Records with identical latitudes and longitudes and overlapping dates were merged (5 records eliminated). Duplicate records (12), modern sites (1), sites which did not meet the inclusion criteria (13), sites where the source was deemed unreliable (5), sites where reliable geographical coordinates were unavailable (12), sites with disputed or doubtful dates (8) and 1 site described in a retracted article were excluded. These procedures left a total of 133 records.

All except 5 of these records referred to sites located between 20° - 60°N and 10° - 40°S and with dates more recent than 46,300 years ago. The most relevant comparison was thus with all cells *in the same range of latitudes*. Including a small number of sites at latitudes north or south of this range would have required a vast expansion of this definition, and the inclusion of many cells with extremely low population densities. Sites located outside this range of latitudes were therefore excluded from the subsequent analysis. For similar reasons, one very early site (Blombos Cave, South Africa) (77,000 years ago) was also excluded. After these exclusions, the dataset comprised 127 records. Subsequent analysis (see below) showed that 8 records referred to sites with inferred population densities less than 1 individual / 100km<sup>2</sup> at the date corresponding to the earliest rock art at the site. These sites were also excluded. Thus, the final analysis was based on a dataset of 119 records.

## **Estimates of population density**

The population density estimates used in our paper combine results from a climate-informed spatial genetic model [35] with an improved model reported in [36]. Briefly, models combine climate estimates for the last 120,000 years, based on the Hadley Centre model HadCM3, with data on patterns of modern genetic variability from the human genome diversity panel-Centre d'Etude du Polymorphisme Humain (HGDP-CEPH), and a mathematical model of local population expansion and dispersal. Estimates of past precipitation and temperature are used to estimate Net Primary Productivity (NPP), and hence maximum human carrying capacity, for each cell in a hexagonal lattice with equal area cells 100 km wide, for all dates from 120,000 years ago

to the present using time steps of 25 years. The carrying capacity is a continuous function of NPP governed by two NPP threshold values and a maximum carrying capacity parameter,  $K$ . The carrying capacity is zero below the lower NPP threshold, increases linearly from zero to  $K$  between the two NPP thresholds, and is constant and equal to  $K$  for NPP above the upper NPP threshold value. Human expansion out of Africa is simulated using a model where populations that have reached the maximum carrying capacity of a cell expand into neighboring cells. Approximate Bayesian Computing is used to compare models with a broad range of parameter values and starting values. Model evaluation is based on their ability to predict regional estimates of pairwise time to most recent common ancestor (TRMCA). Population density estimates for Eurorasia, Africa and Australia were computed using parameters from the high-ranking scenario described in Fig 2 and Movie S1 in [35]. The estimates for the Americas (considered as a single continent) were taken from [36]. Compared to the model presented in [35], this paper contains a more accurate model of ice sheet dynamics in the North of the American continent and related areas of Eastern Asia, more accurate estimates of NPP across the Americas and better dates for the interruption of the Beringian land bridge. Estimated dates for the colonization of the Americas, are more accurate than in the original model.

These population estimates were compared against the results using a second set of population estimates reported in [37]. The data refer to the early exit scenario (Scenario A) described in the paper. As in [35], human population density estimates are based on a climate model (LOVECLIM) combined with a reaction-diffusion Human Dispersal Model. Unlike the model in [35], the estimates do not take account of genetic data. A second difference concerns the population estimator, which is based not just on NPP but also on temperature and predicted “desert fraction” and incorporates *ad hoc* modeling hypotheses absent in the previous model. These include accelerated human dispersal along coastlines (“a coastal express”) and a special Gaussian decay function, modeling the probability of island hopping as a function of distance. For clarity of presentation, we have converted population density estimates from the two models into the same units, namely effective population/ 100km<sup>2</sup>.

## Data analysis

In many sites in our dataset, the rock art reported in the literature spanned a broad range of dates. For the purposes of our analysis, we considered only the *oldest* date for each site. This procedure reduced our sample size and the statistical power of our analysis, but also the risk of artifacts due to dependencies in the data. Each site was associated with the estimated population density for the cell in the population model whose date and center point were closest to the date and location of the site. “All cells” were defined according to the needs of the individual analysis

| Analysis         | Definition of “all cells”                                                                                                                                                                                                                                                    |
|------------------|------------------------------------------------------------------------------------------------------------------------------------------------------------------------------------------------------------------------------------------------------------------------------|
| World            | All cells with non-zero population with dates in the range 0-46,300 years ago and locations between 60°N and 20°N or between 10°S and 40°S                                                                                                                                   |
| Periods          | (1) All cells with non-zero population with age between 0 and 9,999 years.<br>(2) All cells with non-zero population with age between 10,000 and 46,300 years.                                                                                                               |
| France and Spain | Derived from the maximum and minimum latitudes and longitudes for sites in our dataset with locations in modern France or Spain. All cells with non-zero population lying in a “rectangle” with NW corner (lat: 50.84°N, lon: 10°) and SE corner (lat: 35.00°N, lon 7.00°E)  |
| Australia        | Derived from the maximum and minimum latitudes and longitudes for sites in our dataset with locations in modern Australia. All cells with non-zero population lying in a “rectangle” with NW corner (lat: 25.27°S, lon: 133.77°E) and SE corner (lat: 39.16°S, lon: 154.86E) |

**Table 2:** Definition of “All cells” used in the analyses

Data for sites and all cells were binned by population density (35 bins). Numbers of sites and all cells and frequency of sites (sites/all cells) were computed for each bin.

## Testing model predictions

To test the predictions of the model for a specific dataset, we compared the distribution of sites by population density against the equivalent distribution for all cells. Using the two-sided, two sample Kolmogorov-Smirnov test, we tested the null hypothesis that both were drawn from the same distribution. The difference between the medians of the two distributions was tested using the less sensitive Mann-Whitney U test.

Empirical support for the model was estimated using a Bayesian framework. For each of the parameters ( $\gamma$ ,  $\zeta$  and  $\varepsilon$ ) we defined a uniformly distributed set of possible values lying within a plausible range and computed the likelihood of the model for all possible combination of these values, verifying the choice of parameter values using the computed posterior distributions. The value of the critical population density,  $\rho^*$  was inferred inserting the most likely inferred values of  $\gamma$  in the model

$$\rho^* = \gamma^2 \quad (15)$$

The most likely model was then compared against the most likely constant model,  $z(\rho) = k$ , and the most likely proportional model,  $z(\rho) = \zeta\rho$ . The relative likelihoods of the model were quantified using Bayes factors. The results are included in Table 1.

## Sensitivity to potential dating errors

Some kinds of rock art (e.g. petroglyphs) make no use of organic pigments capable of providing an exact date for the artifact. In these cases, dating relies on the analysis of overlying and underlying materials providing minimum and/or maximum dates or on the analysis of other

organic materials stratigraphically associated with the artifact. Dates obtained in this way are subject to large errors.

A further complication comes from the presence in our original dataset of studies with radiocarbon dates whose calibration status is not explicitly stated by the original authors and whose status is thus inherently ambiguous. It is possible, furthermore, that some uncalibrated dates, particularly from older studies, may themselves be of poor quality.

To test the impact of these potential sources of error, we repeated our analysis using only articles providing exact dates obtained directly from the artifact. In the case of radiocarbon dates, we restricted the analysis to sites with calibrated dates provided by the original authors.

## **Analysis by period and geographical area**

Subsets of “sites” and “all cells” belonging to specific date bands (0 – 9,999 years ago, 10,000 – 46,300 years ago) and specific geographical areas with high numbers of sites (France/Spain, Australia) were subjected to the same analyses applied to the full dataset.

## **Sensitivity to the relationship between population density and encounter rate**

To test the sensitivity of our model to the assumed inverse quadratic relationship between population density and encounter rate, we formulated a generalized version of our original model, where the critical population density and the encounter rates are power functions of population density. Thus:

$$\rho^* = \gamma^\varphi$$
$$I^* = \begin{cases} 0, \rho \leq \rho^* \\ 1 - \left(\frac{\rho^*}{\rho}\right)^{\frac{1}{\varphi}}, \rho > \rho^* \end{cases}$$

Replication of our analysis using this generalized model (results not shown) showed that our qualitative empirical findings are robust to changes in the specification of  $\varphi$ .

## **Software**

Data extraction and analysis was based on custom code written in Python 2.7, using the Anaconda development environment.

## **Software availability**

Python source code for the software used to perform the analyses is available under a GPL 3.0 license, at <https://github.com/rwalker1501/cultural-epidemiology.git>. The software includes (i) the script used to generate the figures and tables shown in this paper; (ii) methods to run additional data analyses and to produce figures not shown in the paper; (iii) a menu driven program providing easy to use access to these functions; (iv) documented source code for the statistical calculations and plots used in the paper and the additional analyses

## Data

The GIT repository includes the full rock art database used for the analysis, and copies of the population estimates from the Timmermann and the Eriksson models (reproduced with the permission of the authors). The original population estimates from Eriksson can be found at: <https://osf.io/dafr2/> The original population estimates from Timmermann can be found at <https://climatedata.ibs.re.kr/grav/data/human-dispersal-simulation>



## References

1. Tomasello M. The cultural origins of human cognition. Harvard University Press; 2009.
2. Henrich J. The Secret of Our Success: How Culture Is Driving Human Evolution, Domesticating Our Species, and Making Us Smarter. Princeton University Press; 2015.
3. Laland KN. Darwin's unfinished symphony: how culture made the human mind. Princeton University Press; 2018.
4. Klein RG. Anatomy, behavior, and modern human origins. *J World Prehistory*. 1995;9: 167–198. doi:10.1007/BF02221838
5. Klein RG. Southern Africa and modern human origins. *J Anthropol Res*. 2001; 1–16.
6. McBrearty S, Brooks AS. The revolution that wasn't: a new interpretation of the origin of modern human behavior. *J Hum Evol*. 2000;39: 453–563.
7. d'Errico F, Stringer CB. Evolution, revolution or saltation scenario for the emergence of modern cultures? *Philos Trans R Soc B Biol Sci*. 2011;366: 1060–1069.
8. Scerri EM, Thomas MG, Manica A, Gunz P, Stock JT, Stringer C, et al. Did our species evolve in subdivided populations across Africa, and why does it matter? *Trends Ecol Evol*. 2018.
9. Galway-Witham J, Cole J, Stringer C. Aspects of human physical and behavioural evolution during the last 1 million years. *J Quat Sci*. 2019;34: 355–378.
10. Shennan S. Demography and Cultural Evolution. *Emerging Trends in the Social and Behavioral Sciences*. John Wiley & Sons, Inc.; 2015.
11. Kremer M. Population Growth and Technological Change: One Million B.C. to 1990. *Q J Econ*. 1993;108: 681–716. doi:10.2307/2118405
12. Shennan S. Demography and cultural innovation: a model and its implications for the emergence of modern human culture. *Camb Archaeol J*. 2001;11: 5–16.
13. Premo LS, Kuhn SL. Modeling effects of local extinctions on culture change and diversity in the Paleolithic. *PLoS One*. 2010;5: e15582.
14. Henrich J. Demography and cultural evolution: How adaptive cultural processes can produce maladaptive losses - The Tasmanian case. *Am Antiq*. 2004;69: 197–214. doi:10.2307/4128416
15. Powell A, Shennan S, Thomas MG. Late Pleistocene demography and the appearance of modern human behavior. *Science*. 2009;324: 1298–1301.
16. Lycett SJ, Norton CJ. A demographic model for palaeolithic technological evolution: the case of East Asia and the Movius Line. *Quat Int*. 2010;211: 55–65.
17. Collard M, Vaesen K, Cosgrove R, Roebroeks W. The empirical case against the 'demographic turn' in Palaeolithic archaeology. *Phil Trans R Soc B*. 2016;371: 20150242.
18. Vaesen K, Collard M, Cosgrove R, Roebroeks W. Population size does not explain past changes in cultural complexity. *Proc Natl Acad Sci*. 2016;113: E2241–E2247.
19. Henrich J, Boyd R, Derex M, Kline MA, Mesoudi A, Muthukrishna M, et al. Understanding cumulative cultural evolution. *Proc Natl Acad Sci*. 2016;113: E6724–E6725. doi:10.1073/pnas.1610005113
20. Kline MA, Boyd R. Population size predicts technological complexity in Oceania. *Proc R Soc B Biol Sci*. 2010; rspb20100452.

21. Collard M, Ruttle A, Buchanan B, O'Brien MJ. Population size and cultural evolution in nonindustrial food-producing societies. *PLoS One*. 2013;8: e72628.
22. Collard M, Kemery M, Banks S. Causes of toolkit variation among hunter-gatherers: a test of four competing hypotheses. *Can J Archaeol Can Archéologie*. 2005; 1–19.
23. Collard M, Buchanan B, O'Brien MJ. Population size as an explanation for patterns in the Paleolithic archaeological record. *Curr Anthropol*. 2013;54: S388–S396.
24. Read D. An Interaction Model for Resource Implement Complexity Based on Risk and Number of Annual Moves. *Am Antiq*. 2008;73: 599–625. doi:10.2307/25470520
25. Read D. Population size does not predict artifact complexity: analysis of data from Tasmania, arctic hunter-gatherers, and Oceania fishing groups. *UCLA Hum Complex Syst* 2012. 2012 [cited 9 Feb 2016]. Available: [http://papers.ssrn.com/sol3/papers.cfm?abstract\\_id=2460379](http://papers.ssrn.com/sol3/papers.cfm?abstract_id=2460379)
26. Buchanan B, O'Brien MJ, Collard M. Drivers of technological richness in prehistoric Texas: an archaeological test of the population size and environmental risk hypotheses. *Archaeol Anthropol Sci*. 2016;8: 625–634. doi:10.1007/s12520-015-0245-4
27. Ross R. An Application of the Theory of Probabilities to the Study of a priori Pathometry. Part I. *Proc R Soc Math Phys Eng Sci*. 1916;92: 204–230. doi:10.1098/rspa.1916.0007
28. Kermack WO, McKendrick AG. A contribution to the mathematical theory of epidemics. *Proceedings of the Royal Society of London. The Royal Society*; 1927. pp. 700–721. Available: <http://rspa.royalsocietypublishing.org/content/royprsa/115/772/700.full.pdf>
29. Hethcote HW. Three Basic Epidemiological Models. In: Levin SA, Hallam TG, Gross LJ, editors. *Applied Mathematical Ecology*. Berlin, Heidelberg: Springer Berlin Heidelberg; 1989. pp. 119–144. doi:10.1007/978-3-642-61317-3\_5
30. Sattenspiel L. Population structure and the spread of disease. *Hum Biol*. 1987; 411–438.
31. Grove M. Population density, mobility, and cultural transmission. *J Archaeol Sci*. 2016;74: 75–84.
32. Mary-Rousselière G. *Qitdlarssuaq: Lhistoire dune migration polaire*. Montréal: Presses de l'Université de Montréal; 1980.
33. Rasmussen K. *The people of the Polar north; a record*. Nubu Press; 2010.
34. Calib 7.1. [cited 15 May 2020]. Available: <http://calib.org/calib/calib.html>
35. Eriksson A, Betti L, Friend AD, Lycett SJ, Singarayer JS, Cramon-Taubadel N von, et al. Late Pleistocene climate change and the global expansion of anatomically modern humans. *Proc Natl Acad Sci*. 2012;109: 16089–16094. doi:10.1073/pnas.1209494109
36. Raghavan M, Steinrucken M, Harris K, Schiffels S, Rasmussen S, DeGiorgio M, et al. Genomic evidence for the Pleistocene and recent population history of Native Americans. *Science*. 2015;349: aab3884–aab3884. doi:10.1126/science.aab3884
37. Timmermann A, Friedrich T. Late Pleistocene climate drivers of early human migration. *Nature*. 2016;538: 92–95.
38. Bednarik RG. The pleistocene art of Asia. *J World Prehistory*. 1994;8: 351–375. doi:10.1007/BF02221090
39. Oswalt WH. *An anthropological analysis of food-getting technology*. New York, NY: Wiley; 1976.
40. Zwiefelhofer, D. FindLatitudeAndLongitude. [cited 12 Nov 2019]. Available: <http://www.findlatitudeandlongitude.com/>

41. Alan Williams, Sean Ulm. AustArch: A Database of 14C and Luminescence Ages from Archaeological Sites in Australia. In: Archaeology Data Service [Internet]. [cited 12 Nov 2019]. Available: [https://archaeologydataservice.ac.uk/archives/view/austarch\\_na\\_2014/](https://archaeologydataservice.ac.uk/archives/view/austarch_na_2014/)

## **Acknowledgements**

The idea of testing our model on the case of parietal rock art emerged from a meeting at University College, London, between Richard Walker, Stephen Shennan & Mark Thomas (University College, London) and Anders Eriksson. Axel Timmermann, International Pacific Research Center, University of Hawaii kindly contributed population estimates. Michelle Langley, Griffith University, Brisbane, Australia; Australian National University, Canberra, Australia, contributed data from a published survey of Australian rock art. Werner van Geit, Blue Brain Project, EPFL, Switzerland, contributed important code fragments. Isabel Marquez cross-checked the data for rock art sites. Mark Thomas and Stephan Shennan, Michael Herzog (EPFL Switzerland), Ruedi Füsclin (ZHAW, Switzerland), Lenwood Heath (Virginia Tech, USA) and Francesco Walker (University of Enschede, the Netherlands) reviewed earlier versions of this manuscript, providing valuable feedback. Henry Markram, leader of the Blue Brain Project, provided vital encouragement and support.

## **Author contributions**

RW: conceptualization, methodology, data curation, formal analysis, software, writing

AE: conceptualization, methodology, formal analysis, software, writing

CR: software

TH: formal analysis

FC: formal analysis

## Supplementary Information

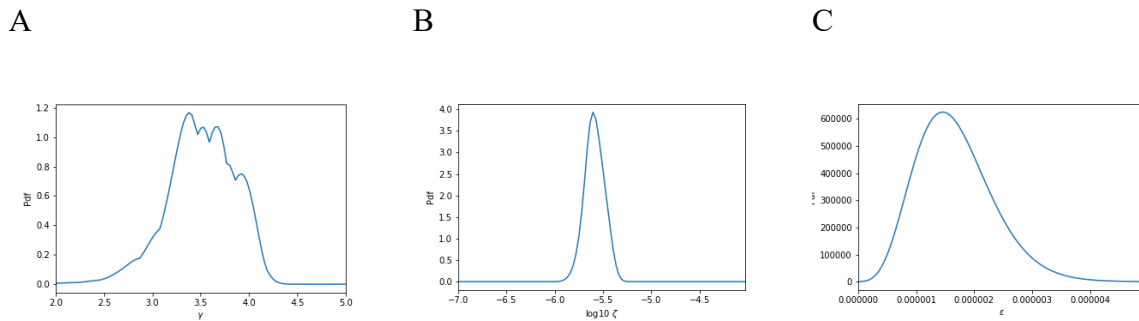

**SI Fig 1:** Posterior distributions for the  $\gamma$ ,  $\xi$ , and  $\epsilon$  parameters for the epidemiological model as shown in Fig 3A (observed site detection rates, for the full archaeological dataset and the combined population estimates in [28,29])

,

bioRxiv preprint doi: <https://doi.org/10.1101/037061>; this version posted June 8, 2020. The copyright holder for this preprint (which was not certified by peer review) is the author/funder, who has granted bioRxiv a license to display the preprint in perpetuity. It is made available under aCC-BY-NC-ND 4.0 International license.

| Name                                                                                                               | Latitude   | Longitude   | Earliest age in sample | Latest age in sample | Country       | Year of reference | Dating method / comment                                                                    | Direct / Indirect | Exact Age / Minimum Age / Max Age | Calibrated | Kind                                     | Figurative                                                                   | Reference |
|--------------------------------------------------------------------------------------------------------------------|------------|-------------|------------------------|----------------------|---------------|-------------------|--------------------------------------------------------------------------------------------|-------------------|-----------------------------------|------------|------------------------------------------|------------------------------------------------------------------------------|-----------|
| Abri Castanet, Dordogne, France                                                                                    | 44.999272  | 1.101261    | 37205                  | 36385                | France        | 2012              | accelerator mass spectrometry (AMS), indirect (bone samples)                               | Indirect          | Minimum Age                       | Yes        | Petroglyphs                              | Yes                                                                          | (1)       |
| Altamira, Spain                                                                                                    | 43.377452  | -4.122347   | 36160                  | 2850                 | Spain         | 2013              | Uranium-series dating                                                                      | Direct            | Exact Age                         | N/A        | Petroglyphs<br>Decorated ceiling in cave | Yes, not all. One is linear red line.                                        | (2)       |
| Altzerri B, Spain                                                                                                  | 43.2369    | -2.148555   | 39479                  | 34689                | Spain         | 2013              | Indirect radiocarbon dating                                                                | Indirect          | Minimum age                       | Yes        | Painting                                 | Yes                                                                          | (3)       |
| Anbamdarr I, Australia/Anbamdarr II, Australia/Gunbardi I, Gunbardi II, Gunbardi III, Northern Territory Australia | -12.255207 | 133.645845  | 1704                   | 111                  | Australia     | 2010              | Direct radiocarbon dating of beeswax sample                                                | Direct            | Exact age                         | Yes        | Beeswax                                  | No                                                                           | (4)       |
| Anta de Serramo, Vianzino, A Coruña, Galicia, Spain                                                                | 43.110048  | -9.03242    | 6950                   | 6950                 | Spain         | 2005              | Direct radiocarbon dating, by AMS on charcoal                                              | Direct            | Exact age                         | Yes        | Painting                                 | N/A                                                                          | (5)       |
| Apollo 11 Cave, IKaras Region, Southwest Namibia                                                                   | -26.842964 | 17.290284   | 32332*                 | 30654*               | Namibia       | 1983              | Radiocarbon dating                                                                         | Indirect          | Minimum age                       | Unknown    | Painted fragments                        | Yes                                                                          | (6)       |
| ARN-0063, Namangon Lightning Man, Northern Territory, Australia                                                    | -12.865524 | 132.814001  | 1021                   | 145                  | Australia     | 2010              | Direct radiocarbon from beeswax                                                            | Direct            | Exact age                         | Yes        | Beeswax                                  | Yes                                                                          | (4)       |
| Bald Rock, Wellington Range, Northern Territory Australia                                                          | -11.8      | 133.15      | 386                    | 174                  | Australia     | 2010              | Direct radiocarbon from beeswax                                                            | Direct            | Exact age                         | Yes        | Beeswax                                  | N/A                                                                          | (4)       |
| Baroalba Springs, Kakadu, Northern Territory, Australia                                                            | -12.677013 | 132.480901  | 7876                   | 7876                 | Australia     | 2010              | Indirect radiocarbon dating via minimum age of mineral salts from rock art surface sampled | Indirect          | Minimum age                       | Yes        | Painting                                 | -                                                                            | (4)       |
| Bhimbetka, India                                                                                                   | 22.939546  | 77.612433   | 5953*                  | 1107*                | India         | 2005              | Direct radiocarbon dating on white paint from figure                                       | Direct            | Exact Age                         | Unknown    | Painting                                 | Yes                                                                          | (7)       |
| Biggarsberg, South Africa                                                                                          | -26.266668 | 28.047223   | 4050                   | 970                  | South Africa  | 2003              | Direct radiocarbon from oxalates underlying and overlying painting                         | Direct            | Exact age                         | Yes        | Painting                                 | N/A                                                                          | (8)       |
| Bighorn Basin, Wyoming and Montana, USA                                                                            | 44.379957  | -108.038989 | 6862                   | 0                    | USA           | 1993              | AMS Radiocarbon dating                                                                     | Direct            | Exact age                         | Yes        | Petroglyphs                              | N/A                                                                          | (9)       |
| Bilasugam, Kumool, Andra Panesh, India                                                                             | 15.828126  | 78.037279   | 5620                   | 4825                 | India         | 2012              | Radiocarbon dating of flowstone on top and below the engraving                             | Indirect          | Minimum Age                       | Yes        | Petroglyph                               | No                                                                           | (10)      |
| Bindu, Kakadu, Northern Territory, Australia                                                                       | -12.677013 | 132.480901  | 183                    | 117                  | Australia     | 2010              | Direct radiocarbon from beeswax                                                            | Direct            | Exact age                         | Yes        | Beeswax dots and lines                   | No                                                                           | (4)       |
| Bush Turkey Dreaming Site, Western Australia                                                                       | -23.96     | 122.97      | 60                     | 60                   | Australia     | 2010              | Direct radiocarbon from beeswax                                                            | Direct            | Exact age                         | Yes        | Painting                                 | Yes                                                                          | (4)       |
| Cape York, Australia                                                                                               | -10.7      | 142.516667  | 678*                   | 675*                 | Australia     | 1993              | Direct radiocarbon dating on plant-fibre binders                                           | Direct            | Exact age                         | Unknown    | Painting                                 | N/A                                                                          | (11)      |
| Casota do Paramo, A Coruña, Spain                                                                                  | 42.704644  | -8.930863   | 5400                   | 5400                 | Spain         | 2005              | Direct radiocarbon dating of charcoal paint samples                                        | Direct            | Maximum Age                       | Yes        | Painting                                 | No                                                                           | (5)       |
| Cave of Beasts, Gifl Kebir, Egypt                                                                                  | 23.441389  | 25.839722   | 8450                   | 6350                 | Egypt         | 2014              | Radiocarbon dating, pottery typology                                                       | Indirect          | N/A                               | N/A        | Painting                                 | Yes                                                                          | (12)      |
| Cave of Bees, Matopos, Zimbabwe                                                                                    | -20.557222 | 28.5125     | 12462*                 | 12462*               | South Africa  | 1983              | Radiocarbon dating on painted spill                                                        | Direct            | Exact age                         | Unknown    | Painting                                 | N/A                                                                          | (6)       |
| Cave of Cougnac, France                                                                                            | 44.756986  | 1.375957    | 28007*                 | 28007*               | France        | 2001              | Direct radiocarbon dating on charcoal from paintings                                       | Direct            | Exact Age                         | Unknown    | Painting                                 | Yes (2 deers)                                                                | (13)      |
| Cave of El Castillo, Spain                                                                                         | 43.292368  | -3.965576   | 41400                  | 22880                | Spain         | 2012, 2001        | Uranium Series disequilibrium dates of calcite deposits underlying or overlying art        | Direct            | Minimum Age                       | N/A        | Pike: Painting                           | Pike: Some, most are disk-shapes<br>Valladas 2001: Yes<br>Valladas 1992: Yes | (14)      |
| Cave of Niaux, France                                                                                              | 42.820098  | 1.593487    | 15390*                 | 15390*               | France        | 1992              | Valladas 1992: Direct radiocarbon dating<br>Cloches 1992:                                  | Direct            | Exact age                         | Unknown    | Painting                                 | Yes                                                                          | (15)      |
| Chauvet-Pont-d'Arc Cave, France                                                                                    | 44.387244  | 4.415865    | 36292*                 | 34337*               | France        | 2001              | Direct radiocarbon dating from painting                                                    | Direct            | Exact age                         | Unknown.   | Painting                                 | Yes                                                                          | (16)      |
| Chifubwa Stream Shelter, Zambia                                                                                    | -12.2      | 26.683333   | 7227*                  | 7227*                | Zambia        | 1979              | Indirect radiocarbon                                                                       | Indirect          | Minimum age                       | Unknown    | Engraving                                | No                                                                           | (17)      |
| Colboasia Cave, Romania                                                                                            | 46.53089   | 22.597332   | 35917                  | 35917*               | Romania       | 2012              | Radiocarbon dating of charcoal layer atop drawing                                          | Direct            | Exact age                         | Unknown    | Drawings                                 | Yes                                                                          | (18)      |
| Cosquer cave, Calanque de Morgiou, France                                                                          | 43.210931  | 5.445896    | 32190*                 | 21567*               | France        | 2001              | Radiocarbon dating                                                                         | Direct            | Exact Age                         | No         | Painting                                 | Yes                                                                          | (16)      |
| Colo dos Muros, Baixo Miño, Northwest Iberia                                                                       | 41.999517  | -8.770147   | 6340                   | 4020                 | Spain         | 2005              | Radiocarbon dating                                                                         | Direct            | Maximum Age                       | Yes        | Painting                                 | N/A                                                                          | (5)       |
| Covaciella, Spain                                                                                                  | 43.318232  | -4.875262   | 17113                  | 16881                | Spain         | 2001              | Radiocarbon dating                                                                         | Yes               | Exact age                         | Yes        | Painting                                 | Yes                                                                          | (16)      |
| Deighton Lady, Jowalbinna, Queensland Australia                                                                    | -15.5333   | 144.7833    | 6483                   | 2905                 | Australia     | 2010              | Minimum age radiocarbon dating based on minimum age of oxalate sample                      | Indirect          | Minimum age                       | Yes        | Engraving                                | No                                                                           | (4)       |
| Djarnig, West Arnhem Land, Northern Territory, Australia                                                           | -12.091834 | 132.890495  | 720                    | 119                  | Australia     | 2010              | Direct radiocarbon from beeswax                                                            | Direct            | Exact age                         | Yes        | Beeswax                                  | Yes                                                                          | (4)       |
| Djulini, Arnhem Land, Northern Territory, Australia                                                                | -12.091834 | 132.890495  | 383                    | 172                  | Australia     | 2010              | Direct radiocarbon from beeswax                                                            | Direct            | Exact age                         | Yes        | Beeswax                                  | Yes                                                                          | (4)       |
| East Alligator River, Northern Territory, Australia                                                                | -12.525429 | 133.060161  | 4287                   | 122                  | Australia     | 2010              | Direct radiocarbon from beeswax                                                            | Direct            | Exact age                         | Yes        | Beeswax                                  | No                                                                           | (4)       |
| Echidna's Rest, Queensland, Australia                                                                              | -27.542345 | 153.07315   | 1291                   | Modern               | Australia     | 2010              | Direct radiocarbon from charcoal                                                           | Direct            | Exact age                         | Yes        | Drawings and engraving                   | No                                                                           | (4)       |
| El Hosh, Egypt (6km north of Gebel Sâila)                                                                          | 24.642614  | 32.92968    | 7550                   | 2325                 | Egypt         | 2001              | Direct radiocarbon dating                                                                  | Direct            | Exact Age                         | Yes        | Petroglyphs                              | Yes                                                                          | (19)      |
| Emu Cave, New South Wales, Australia                                                                               | -33.782342 | 150.590426  | 1857                   | 1857                 | Australia     | 2010              | Radiocarbon dating on sample collected from over an emu track                              | Indirect          | Minimum age                       | Yes        | Engraving                                | Yes                                                                          | (4)       |
| Fairseu, Coa Valley, Portugal                                                                                      | 41.079991  | -7.111782   | 18400                  | 10800                | Portugal      | 2006              | optical luminescence (OSL) from burnt lithic remains                                       | Indirect          | Minimum age                       | N/A        | Petroglyphs                              | Yes                                                                          | (20)      |
| Felra Hé Cave, Lifou Island, New Caledonia                                                                         | -21.038497 | 167.240515  | 2570                   | 983                  | New Caledonia | 2006              | Radiocarbon dating                                                                         | Direct            | Exact age                         | Yes        | Hand stencils                            | Some                                                                         | (21)      |
| Fomo dos muros, Portugal                                                                                           | 40.224238  | -8.636221   | 5840                   | 5505                 | Portugal      | 2005              | Direct radiocarbon                                                                         | Direct            | Exact age                         | Yes        | Painting                                 | N/A                                                                          | (5)       |
| Foz Coa, Portugal                                                                                                  | 41.082247  | -7.14036    | 2000                   | 100                  | Portugal      | 1996              | Radiocarbon dating of microorganisms in cracks in engravings                               | Indirect          | Minimum age                       | N/A        | Petroglyphs                              | Yes                                                                          | (22)      |
| Fuente de el Salín, Muñozrodo Spain                                                                                | 43.364429  | -4.482981   | 26595*                 | 26596*               | Spain         | 2017              | Indirect radiocarbon dating on charcoal from associated hearth                             | Indirect          | Minimum age                       | Unknown    | Painting                                 | N/A                                                                          | (23)      |
| Gargas, France                                                                                                     | 43.90322   | 5.357388    | 30988*                 | 30988*               | France        | 1992              | Radiocarbon dating                                                                         | Indirect          | Minimum age                       | Unknown    | Hand stencils, engravings                | Yes                                                                          | (24)      |
| Giant Horse, Laura, Queensland, Australia                                                                          | -15.5384   | 144.4566    | 474                    | 474                  | Australia     | 2010              | Direct radiocarbon in layered paint                                                        | Direct            | Exact age                         | Yes        | Painting                                 | -                                                                            | (4)       |

bioRxiv preprint doi: <https://doi.org/10.1101/705137>; this version posted June 13, 2020. The copyright holder for this preprint (which was not certified by peer review) is the author/funder, who has granted bioRxiv a license to display the preprint in perpetuity. It is made available under aCC-BY-ND 4.0 International license.

| Site Name                                                                    | Latitude   | Longitude   | Altitude (m) | Area (km <sup>2</sup> ) | Country      | Year | Dating Method                                                                  | Dating Type | Material    | Age Range | Material                    | Material | Material | Material | Material |
|------------------------------------------------------------------------------|------------|-------------|--------------|-------------------------|--------------|------|--------------------------------------------------------------------------------|-------------|-------------|-----------|-----------------------------|----------|----------|----------|----------|
| Grande Grotte, Arcy-sur-Cure, France                                         | 47.591452  | 3.766392    | 458          | 2073                    | France       | 2013 | Radiocarbon dating on associated bone and tooth specimens                      | Indirect    | N/A         | Yes       | Painting                    | N/A      | (26)     |          |          |
| Grotta di Fumane, Italy                                                      | 45.592481  | 10.90443    | 41000        | 41000                   | Italy        | 2009 | Radiocarbon dating of wood carbon associated with paintings                    | Indirect    | Exact Age   | Yes       | Painting                    | Yes      | (27)     |          |          |
| Grotte d'Aldène, Cesseras, France                                            | 43.353897  | 2.698387    | 34263*       | 34263*                  | France       | 2005 | AMS                                                                            | Indirect    | N/A         | Unknown   | Engravings                  | N/A      | (28)     |          |          |
| Grotte de Cussac, Dordogne River Valley, France                              | 44.829444  | 0.847778    | 29209        | 3426                    | France       | 2017 | U-Th and 14C for speleothems, 14C-AMS for organic materials, bone and charcoal | Indirect    | Mixed       | Unknown   | Painting                    | Yes      | (29)     |          |          |
| Gua Saleh, Sangkuliran - Mangkalihat Peninsula, Kalimantan Island, Indonesia | 1.035717   | 118.065445  | 27270        | 9820                    | Indonesia    | 2003 | Cross-dating using Th/U and AMS of calcite covering paintings                  | Indirect    | Minimum age | Yes       | Paintings                   | Yes      | (30)     |          |          |
| Gumbilgumung, Australia                                                      | -12.8      | 133.3       | 4297*        | 145*                    | Australia    | 2010 | Direct radiocarbon on beeswax                                                  | Direct      | Exact Age   | Yes       | Beeswax                     | Yes      | (31)     |          |          |
| Hathitol, India                                                              | 23.152243  | 79.920672   | 526*         | 2882*                   | India        | 2005 | Direct radiocarbon on painting pigment                                         | Direct      | Exact Age   | Unknown   | Painting                    | Yes      | (7)      |          |          |
| Hay Cave, Queensland, Australia                                              | -23.167328 | 150.490387  | 2484*        | 925*                    | Australia    | 2010 | Direct charcoal pig                                                            | Direct      | Exact age   | No        | Painting                    | No       | (4)      |          |          |
| Ignatievskaya Cave, Russia                                                   | 54.899497  | 57.781586   | 8790         | 6925                    | Russia       | 2002 | Radiocarbon dating on charcoal pigment                                         | Direct      | Exact Age   | Yes       | Painting                    | Yes      | (32)     |          |          |
| Ingaladdi, Willeroo, Northern Territory, Australia                           | -15.29028  | 131.575195  | 7676         | 7676                    | Australia    | 2010 | Radiocarbon dating on charcoal samples using minimum age                       | Indirect    | Minimum age | Yes       | Engraving                   | N/A      | (4)      |          |          |
| Jampori, India                                                               | 24.515475  | 87.081156   | 1634*        | 1634*                   | India        | 2005 | Direct radiocarbon dating on paint                                             | Direct      | Exact Age   | Unknown   | Painting                    | No       | (7)      |          |          |
| Jinsha, China                                                                | 26.855047  | 100.22775   | 5216         | 5216                    | China        | 2012 | Uranium-series dating on calcite samples above and beneath painting            | Indirect    | Maximum Age | N/A       | Painting                    | Yes      | (33)     |          |          |
| Kaapli site, Western Australia (Near Calvert Ranges)                         | -23.95     | 122.72      | 377          | 308                     | Australia    | 2010 | Radiocarbon dating of sample pigment                                           | Direct      | Exact age   | Yes       | Painting                    | N/A      | (4)      |          |          |
| Kaho'olawe, Hawaii, USA                                                      | 20.558047  | -156.605738 | 923          | 0                       | Hawaii       | 1996 | Radiocarbon dating of sampled petroglyph                                       | Indirect    | Minimum age | Yes       | Painting                    | Yes      | (34)     |          |          |
| Kapova cave, Russia                                                          | 53.043799  | 57.065139   | 17.870       | 16893                   | Russia       | 1989 | Radiocarbon dating of charcoal from cultural stratum                           | Indirect    | Unknown     | Unknown   | Painting                    | Yes      | (35)     |          |          |
| Kennedy River, Queensland, Australia                                         | -15.5906   | 144.0308    | 1132         | 1132                    | Australia    | 2010 | Radiocarbon dating of oxalate sample                                           | Indirect    | Minimum age | Yes       | Engraving                   | Yes      | (4)      |          |          |
| Kimberley, Australia                                                         | -17.34918  | 125.915207  | 4300         | 1350                    | Australia    | 2010 | Radiocarbon dating of paint                                                    | Direct      | Exact age   | Yes       | Painting                    | Yes      | (4)      |          |          |
| La Gama, Cantabria, Spain                                                    | 43.151944  | -3.896389   | 16875        | 16875                   | Spain        | 2013 | Direct radiocarbon dating                                                      | Direct      | Exact age   | Yes       | Paintings                   | Yes      | (26)     |          |          |
| La Pileta, Spain                                                             | 36.691297  | -5.2699     | 24228        | 24228                   | Spain        | 2013 | Direct radiocarbon dating                                                      | Direct      | Exact age   | Yes       | Paintings                   | Yes      | (26)     |          |          |
| La Tête du lion, France                                                      | 45.777403  | 4.855214    | 26760        | 25997                   | France       | 2013 | Indirect radiocarbon dating on charcoal                                        | Indirect    | Minimum age | Yes       | Paintings                   | N/A      | (26)     |          |          |
| Labastide, France                                                            | 43.035546  | 0.352267    | 17476        | 484                     | France       | 2013 | Radiocarbon dating                                                             | Direct      | Exact age   | Yes       | Paintings                   | Yes      | (26)     |          |          |
| Lapa do Santo, Brazil                                                        | -19.477778 | -44.038889  | 10600        | 10600                   | Brazil       | 2012 | Direct radiocarbon ages assisted by OSL                                        | Yes         | Exact age   | Yes       | Petroglyph                  | Yes      | (36)     |          |          |
| Lascaux Cave, France                                                         | 45.053919  | 1.167651    | 22723        | 18848                   | France       | 2013 | Radiocarbon dating                                                             | Indirect    | Minimum age | Yes       | Paintings                   | Yes      | (26)     |          |          |
| Lene Hara Cave, East Timor                                                   | -8.411695  | 127.293235  | 11350        | 11350                   | East Timor   | 2007 | Plasma mass spectrometry                                                       | Direct      | Exact age   | Yes       | Paintings                   | N/A      | (37)     |          |          |
| Lower Pecos, Texas                                                           | 31.422912  | -103.493229 | 4290*        | 4290*                   | USA          | 1995 | Direct AMS C14                                                                 | Direct      | Exact Age   | Unknown   | Painting                    | N/A      | (38)     |          |          |
| M23, Calvert Ranges, Western Australia                                       | -23.966667 | 122.966667  | 2085         | 759                     | Australia    | 2010 | Direct radiocarbon dating of pigment sampled                                   | Direct      | Exact age   | Yes       | Painting                    | N/A      | (4)      |          |          |
| Malangine Cave, Nene Valley, South Australia                                 | -38.05     | 140.69      | 6348         | 5046                    | Australia    | 2010 | Radiocarbon dating of speleothem deposit                                       | Indirect    | Minimum age | Yes       | Figure Fluting & Engraving  | No       | (4)      |          |          |
| Mámoa do Monte: Dos Marxos                                                   | 42.648475  | -7.946347   | 6110         | 5495                    | Portugal     | 2005 | Direct AMS C14 of paint                                                        | Direct      | Exact age   | Yes       | Painting                    | N/A      | (5)      |          |          |
| Marjar - East Alligator, Northern Territory, Australia                       | -13.092293 | 132.393766  | 191          | 191                     | Australia    | 2010 | Direct radiocarbon dating of beeswax sample from motif                         | Direct      | Exact age   | Yes       | Beeswax                     | N/A      | (4)      |          |          |
| Menng-e-ya 1, Northern Territory (near Willeroo)                             | -15.29028  | 131.575195  | 4488*        | 4488*                   | Australia    | 2010 | Radiocarbon dating of base of the cortex                                       | Indirect    | Minimum age | No        | Engraving                   | No       | (4)      |          |          |
| Messak Plateau, Fezzan, Libya                                                | 25.75      | 11.833333   | 6946*        | 5906*                   | Libya        | 2010 | Radiocarbon dating on associated stone monuments                               | Indirect    | N/A         | Unknown   | Engraving                   | N/A      | (39)     |          |          |
| Mickey Springs 31, Hughenden, Queensland, Australia                          | -20.85     | 144.2       | 5929         | 5929                    | Australia    | 2010 | Radiocarbon dating                                                             | Unknown     | Unknown     | Yes       | Engraving                   | No       | (4)      |          |          |
| Moonface site, Queensland, Australia                                         | -21.5097   | 140.6679    | 796          | 796                     | Australia    | 2010 | Direct radiocarbon dating of charcoal sampled                                  | Direct      | Exact age   | Yes       | Painting                    | Yes      | (4)      |          |          |
| Moses Cave, Amhem Land, Northern Territory, Australia                        | -12.430204 | 130.882379  | 274          | 274                     | Australia    | 2010 | Direct radiocarbon from beeswax sample from motif                              | Direct      | Exact age   | Yes       | Beeswax                     | No       | (4)      |          |          |
| Mount Manning, Western Australia                                             | -30.12203  | 119.742604  | 586          | 182                     | Australia    | 2010 | Indirect radiocarbon dating of charcoal ochre layers associated with drawings  | Indirect    | N/A         | Yes       | Drawing                     | No       | (4)      |          |          |
| Mungana Site, Queensland, Australia                                          | -17.118416 | 144.398988  | 3644         | 1177                    | Australia    | 2010 | Direct radiocarbon dating of charcoal sampled                                  | Direct      | Exact age   | Yes       | Drawing                     | No       | (4)      |          |          |
| Nangator (Nanguluwur), Kakadu National Park, Northern Territory, Australia   | -13.092293 | 132.393766  | 5570         | 776                     | Australia    | 2010 | Indirect radiocarbon dating of mineral salts from rock art surface sampled     | Indirect    | Minimum Age | Yes       | Painting                    | No       | (4)      |          |          |
| Nara Inlet, Queensland                                                       | -20.15*    | 148.9       | 2489         | 2489                    | Australia    | 2010 | Radiocarbon dating of charcoal sample                                          | Unknown     | Unknown     | Yes       | Unknown                     | N/A      | (4)      |          |          |
| Natal Drakkenberg, South Africa                                              | -29.466667 | 29.266667   | 675          | 402                     | South Africa | 1997 | AMS Radiocarbon dating Andra 3 through associated plant fibers                 | Indirect    | N/A         | Yes       | Painting                    | No       | (40)     |          |          |
| Nawarla Gabammang, Jawoyn Country, Amhem Land Australia                      | -12.1685   | 133.8335    | 27630        | 27630                   | Australia    | 2013 | Direct radiocarbon dating of charcoal pigment                                  | Direct      | Exact age   | Yes       | Painting                    | N/A      | (41)     |          |          |
| Nerja, Spain                                                                 | 36.785916  | -3.804483   | 23821        | 23821                   | Spain        | 2013 | Radiocarbon dating                                                             | Indirect    | Minimum age | Yes       | Drawings and torch rubbings | N/A      | (26)     |          |          |

bioRxiv preprint doi: <https://doi.org/10.1101/705137>; this version posted June 8, 2020. The copyright holder for this preprint (which was not certified by peer review) is the author/funder, who has granted bioRxiv a license to display the preprint in perpetuity. It is made available under aCC-BY-ND 4.0 International license.

| Site Name                                                      | Latitude    | Longitude  | Easting | Northing | Country      | Year | Dating Method                                                                                       | Dating Type | Age                                                                                                            | Material | Sample Type                 | Notes   | Yes | No   | Other |
|----------------------------------------------------------------|-------------|------------|---------|----------|--------------|------|-----------------------------------------------------------------------------------------------------|-------------|----------------------------------------------------------------------------------------------------------------|----------|-----------------------------|---------|-----|------|-------|
| Ojo Guareña, Burgos, Spain                                     | 43.034337   | -3.66452   | 13377*  | 12806*   | Spain        | 2009 | Direct radiocarbon dating of coal pigment                                                           | Direct      | Exact age                                                                                                      | Unknown  | Paintings                   | Yes     |     | (42) |       |
| Padahlin, Taunggyi District, Shan State, Myanmar               | 20.763697   | 96.920913  | 8'515"  | 1'664"   | Myanmar      | 1971 | AMS Radiocarbon dating                                                                              | Indirect    | Unknown                                                                                                        | Unknown  | Painting                    | Yes     |     | (43) |       |
| Painted Shelter, Queensland, Australia                         | -16.1295    | 144.1289   | 2484*   | 2484*    | Australia    | 2010 | Direct radiocarbon dating                                                                           | Direct      | Exact Age                                                                                                      | No       | Painting                    | Yes     |     | (4)  |       |
| Panaramitee, Flinders Ranges, South Australia                  | -31.416667  | 138.75     | 46273   | 3876     | Australia    | 2010 | Indirect radiocarbon dating of rock varnish                                                         | Indirect    | Minimum age                                                                                                    | No       | Engraving                   | No      |     | (4)  |       |
| Pech Merle, France                                             | 44.507308   | 1.64408    | 28727*  | 28727*   | France       | 2001 | Radiocarbon dating                                                                                  | Direct      | Exact age                                                                                                      | Unknown  | Painting                    | Yes     |     | (13) |       |
| Pedra Cuberta                                                  | 43.089554   | -8.984605  | 5775    | 5620     | Spain        | 2005 | Radiocarbon AMS                                                                                     | Direct      | Exact                                                                                                          | Yes      | Painting                    | Yes     |     | (5)  |       |
| Pedra da Moura, Vimianzo, A Coruña, Spain                      | 43.081351   | -8.977859  | 5745    | 5745     | Spain        | 2005 | Direct radiocarbon dating from megalithic paint                                                     | Direct      | Exact age                                                                                                      | Yes      | Painting                    | N/A     |     | (5)  |       |
| Pedra Pintada, Monte Alegre, Brazil                            | -2.051761   | 54.182912  | 13019*  | 11950*   | Brazil       | 1996 | Radiocarbon dating (56) and thermoluminescence (13)                                                 | Indirect    | Minimum age                                                                                                    | Unknown  | Painting                    | Yes     |     | (44) |       |
| Pete's Chase, Queensland                                       | -16.1295    | 144.1289   | 2064    | 385      | Australia    | 2010 | Direct radiocarbon dating of pigment sampled                                                        | Direct      | Exact age                                                                                                      | No       | Painting                    | Yes     |     | (4)  |       |
| Pilbara, Western Australia, Australia                          | -21.883333  | 116.766667 | 4'040"  | 2'731"   | Australia    | 2009 | Radiocarbon dating                                                                                  | Indirect    | Minimum age                                                                                                    | Unknown  | Petroglyphs                 | Yes     |     | (45) |       |
| Pomongwe Cave, Zimbabwe                                        | -20.547412* | 28.513674  | 5526*   | 4611*    | Zimbabwe     | 1983 | Direct radiocarbon dating from spalls with paint from 2 layers                                      | Direct      | Exact age                                                                                                      | Unknown  | Painting                    | N/A     |     | (6)  |       |
| Pondra, Cantabria, Spain                                       | 43.266475   | -3.423179  | 22000   | 22000    | Spain        | 2013 | Thermoluminescence                                                                                  | Indirect    | Minimum age                                                                                                    | N/A      | Painting                    | Yes     |     | (46) |       |
| Possum Cave, Queensland, Australia                             | -10.7*      | 142.516667 | 9501    | 2217     | Australia    | 2010 | Radiocarbon dating on oxalate sampled                                                               | Indirect    | Minimum age                                                                                                    | Yes      | Engraving                   | No      |     | (4)  |       |
| Prung-Cart Cave, South Australia (near Millicent)              | -37.090413  | 140.829791 | 2783    | 1076     | Australia    | 2010 | Radiocarbon dating on catzite sampled                                                               | Indirect    | Minimum age                                                                                                    | Yes      | Figure fluting              | Unknown |     | (4)  |       |
| Purtijama, Cleland Hills, Northern Territory, Australia        | -23.883333  | 130.866667 | 2747    | 548      | Australia    | 2010 | Radiocarbon dating on oxalate sampled                                                               | Indirect    | Minimum age                                                                                                    | Yes      | Engraving                   | No      |     | (4)  |       |
| Quinkans B6 Rockshelter, Queensland, Australia                 | -15.6286    | 144.5308   | 2999    | 845      | Australia    | 2010 | Radiocarbon dating on oxalate sampled                                                               | Indirect    | Minimum Age                                                                                                    | Yes      | Engraving & Painting        | No      |     | (4)  |       |
| Qurla, Egypt                                                   | 24.629167   | 32.9625    | 17000   | 10000    | Egypt        | 2011 | Direct Optically Stimulated Luminescence (OSL)                                                      | Direct      | Exact Age                                                                                                      | N/A      | Petroglyph                  | Yes     |     | (47) |       |
| Racecourse Site, Queensland, Australia                         | -17.1747    | 144.4994   | 2031    | 2031     | Australia    | 2010 | Direct radiocarbon dating on charcoal pigment                                                       | Direct      | Exact Age                                                                                                      | Yes      | Drawing                     | No      |     | (4)  |       |
| Red Lady, Queensland, Australia                                | -15.762116  | 144.257562 | 8'213"  | 8'213"   | Australia    | 2010 | Indirect radiocarbon dating on silica sampled                                                       | Indirect    | Minimum Age                                                                                                    | Yes      | Painting                    | Yes     |     | (4)  |       |
| Robin Hood Cave and Church Hole, Creswell Crags, UK            | 53.263491   | -1.193529  | 15700   | 13'200   | UK           | 2005 | Uranium-series disequilibrium dating on thin layer of flowstones covering the surface (Minimum age) | Indirect    | Minimum Age                                                                                                    | Yes      | Engravings                  | Yes     |     | (48) |       |
| RSA TYN2, Drakensberg Mountains, Eastern Cape, South Africa    | -29.466667  | 29.266667  | 2009    | 1971     | South Africa | 2011 | Direct radiocarbon dating                                                                           | Direct      | Exact age                                                                                                      | Yes      | Paintings                   | Unknown |     | (49) |       |
| Sandy Creek 1 & 2, Queensland, Australia                       | -16         | 144        | 33676*  | 3'126    | Australia    | 2005 | Indirect radiocarbon dating on oxalate sampled                                                      | Indirect    | Minimum Age                                                                                                    | Yes      | Painting                    | Yes     |     | (50) |       |
| Sepen's Glen 1, Wiluna, Western Australia                      | -25.216667  | 120.75     | 3'417   | 377      | Australia    | 2010 | Direct radiocarbon dating on paint sampled                                                          | Direct      | Exact Age                                                                                                      | Yes      | Painting                    | No      |     | (4)  |       |
| Serra de Capivara, Brazil                                      | -8.695278   | -42.586267 | 9'863"  | 1'028"   | Brazil       | 2013 | Radiocarbon dating                                                                                  | Indirect    | N/A                                                                                                            | Yes      | Paintings                   | N/A     |     | (51) |       |
| Snake Site, Cannon Hill, Northern Territory, Australia         | -12.3       | 132.57     | 563     | 563      | Australia    | 2010 | Indirect radiocarbon dating on mineral salts from rock art surface                                  | Indirect    | Minimum age                                                                                                    | Yes      | Painting                    | N/A     |     | (4)  |       |
| Spirit Cave, Anbangbang, Kakadu, Northern Territory, Australia | -12.865524  | 132.814001 | 14'182" | 3'747"   | Australia    | 2010 | Indirect radiocarbon dating on oxalate sampled                                                      | Indirect    | Minimum Age                                                                                                    | Yes      | Painting                    | No      |     | (4)  |       |
| Split rock, Queensland, Australia                              | -15.6525    | 144.4975   | 7'433"  | 7'433"   | Australia    | 2010 | Direct radiocarbon dating on silica sampled                                                         | Direct      | Exact Age                                                                                                      | Yes      | Painting                    | N/A     |     | (4)  |       |
| Steenbokfontein Cave, South Africa                             | -32.161667  | 18.333333  | 9'392"  | 2'220"   | South Africa | 1999 | AMS dating                                                                                          | Indirect    | Minimum age                                                                                                    | Unknown  | Painting                    | No      |     | (52) |       |
| Sturt Meadows, New South Wales, Australia                      | -31.11      | 140.4      | 12'237" | 11'978"  | Australia    | 2010 | Indirect radiocarbon dating on calcium carbonate sampled                                            | Indirect    | Minimum Age                                                                                                    | Yes      | Engraving                   | N/A     |     | (4)  |       |
| Sulawesi, Indonesia                                            | -1.8479     | 120.5279   | 44'000" | 17'770"  | Indonesia    | 2014 | Uranium-series dating of coralloid speleothems                                                      | Indirect    | Minimum age                                                                                                    | Yes      | Hand stencils and paintings | Yes     |     | (53) |       |
| Tassili-n-Ajjer, Algeria                                       | 25.813595   | 8.133856   | 8'237"  | 2'287"   | Algeria      | 2012 | AMS Radiocarbon dating                                                                              | Indirect    | N/A                                                                                                            | Yes      | Paintings                   | Yes     |     | (54) |       |
| Tennessee, Cumberland Plateau                                  | 35.949603   | -85.027047 | 5'698"  | N/A      | USA          | 2013 | AMS Radiocarbon dating                                                                              | Direct      | Exact Age                                                                                                      | Yes      | Charcoal pictograph         | Yes     |     | (55) |       |
| Tito Bustillo Cave, Spain                                      | 43.460706   | -5.067392  | 36200   | 29'650"  | Spain        | 2012 | U-series disequilibrium dating                                                                      | Indirect    | Mixed                                                                                                          | Yes      | Paintings                   | Yes     |     | (14) |       |
| ukKhalamba, South Africa                                       | -29.380485  | 29.546     | 4'050"  | 990      | South Africa | 2003 | Indirect radiocarbon dating                                                                         | Indirect    | Maximum age                                                                                                    | Yes      | Painting                    | Yes     |     | (8)  |       |
| Unnamed sites 1-3, Kimberley, Western Australia                | -17.34918   | 125.915207 | 23800   | Modem    | Australia    | 2010 | Indirect radiocarbon dating from sampled mud-wasp nest overlying paintings                          | Indirect    | Minimum Age                                                                                                    | No       | Painting                    | Yes     |     | (4)  |       |
| Urdiales, Spain                                                | 43.368822   | -3.215635  | 15'223" | 15'223"  | Spain        | 2013 | Radiocarbon dating                                                                                  | Direct      | Exact age                                                                                                      | Yes      | Painting                    | Yes     |     | (26) |       |
| Ukran-e-Rub, Lower Jordan Valley, Israel                       | 32.422877   | 35.302723  | 20204*  | 20204*   | Israel       | 2010 | Unknown                                                                                             | Unknown     | Unknown                                                                                                        | Unknown  | Engraving                   | No      |     | (56) |       |
| Villars, France                                                | 45.442277   | 0.785135   | 21'735" | 17'473"  | France       | 2013 | Radiocarbon dating                                                                                  | Direct      | Exact age                                                                                                      | Yes      | Drawings and torch rubbings | No      |     | (26) |       |
| Walkunder Arch Cave, Queensland, Australia                     | -17.2297    | 144.5169   | 34254   | 3575     | Australia    | 2010 | Indirect radiocarbon dating on oxalate, graphite sampled                                            | Indirect    | Maximum age for date to use; different samples have minimum age, maximum age, middle date, and supporting date | Yes      | Paintings & Engraving       | N/A     |     | (4)  |       |
| Wanga East, Northern Territory, Australia                      | -24.19      | 131.4      | 8'093"  | 1'332"   | Australia    | 2010 | Indirect radiocarbon dating on oxalate formation                                                    | Indirect    | Minimum age                                                                                                    | Yes      | Engraving                   | Yes     |     | (4)  |       |



bioRxiv preprint doi: <https://doi.org/10.1101/705137>; this version posted June 8, 2020. The copyright holder for this preprint (which was not certified by peer review) is the author/funder, who has granted bioRxiv a license to display the preprint in perpetuity. It is made available under aCC-BY-ND 4.0 International license.

| Watermark                                                                                                                      | Sample ID | Age (cal BP) | Age (uncal BP) | Age (uncal BP) | Age (uncal BP) | Country      | Year | Dating Method                                                                                                                    | Dating Type | Minimum Age                               | Yes/No  | Material   | Yes/No | Notes |
|--------------------------------------------------------------------------------------------------------------------------------|-----------|--------------|----------------|----------------|----------------|--------------|------|----------------------------------------------------------------------------------------------------------------------------------|-------------|-------------------------------------------|---------|------------|--------|-------|
| Wharton Hill, Australia                                                                                                        |           | -32.64       | 139.77         | 41084*         | 41'084*        | Australia    | 1992 | Radiocarbon dating                                                                                                               | Indirect    | Minimum age                               | Unknown | Petroglyph | Yes    | (57)  |
| Winnemucca Lake, Nevada, Usa                                                                                                   |           | 40.12185     | -119.339623    | 12'500         | 12'500         | USA          | 2013 | Radiocarbon dating                                                                                                               | Indirect    | Minimum age                               | Yes     | Painting   | No     | (58)  |
| Wondewerk Cave, South Africa                                                                                                   |           | -27.84673    | 23.55418       | 11'898*        | 1'138*         | South Africa | 1981 | Radiocarbon dating (minimum age)                                                                                                 | Indirect    | Minimum age                               | Unknown | Engraving  | No     | (59)  |
| Wurk (Mann River E1002, 1004, 1005), Northern Territory, Australia/Ykamakkal (Mann River A1005), Northern Territory, Australia |           | -12.219481   | 134.143519     | 646            | 183            | Australia    | 2010 | Direct radiocarbon                                                                                                               | Direct      | Exact Age                                 | Yes     | Beeswax    | Yes    | (4)   |
| Yam Camp, Cape York, Queensland, Australia                                                                                     |           | -15.7823     | 144.2341       | 682            | 602            | Australia    | 2010 | Direct radiocarbon dating from plant fibre binders (Earliest age) & indirect radiocarbon dating with oxalate sample (Latest age) | Direct      | Exact Age, but latest date is minimum age | Yes     | Painting   | Yes    | (4)   |
| Ywarlarlay, Northern Territory, Australia                                                                                      |           | -12.36686    | 130.88125      | 4'592          | 3'386          | Australia    | 2010 | Indirect radiocarbon                                                                                                             | Indirect    | Minimum age                               | Yes     | Engraving  | Yes    | (4)   |
| Yunta Springs, South Australia                                                                                                 |           | -32.54       | 139.55         | 17'020         | 1'398          | Australia    | 2010 | Indirect radiocarbon                                                                                                             | Indirect    | Minimum age                               | Yes     | Engraving  | Mixed  | (4)   |

Note: Dates marked with an \* were calibrated by the authors, based on uncalibrated dates in the original article, or on date inferred as uncalibrated ( see methods)

## References for SI Table 1

1. White R, Mensan R, Bourrillon R, Cretin C, Higham TF, Clark AE, et al. Context and dating of Aurignacian vulvar representations from Abri Castanet, France. *Proc Natl Acad Sci.* 2012;109: 8450–8455.
2. García-Diez M, Hoffmann DL, Zilhão J, de las Heras C, Lasheras JA, Montes R, et al. Uranium series dating reveals a long sequence of rock art at Altamira Cave (Santillana del Mar, Cantabria). *J Archaeol Sci.* 2013;40: 4098–4106.
3. González-Sainz C, Ruiz-Redondo A, Garate-Maidagan D, Iriarte-Avilés E. Not only Chauvet: dating Aurignacian rock art in Altxerri B Cave (northern Spain). *J Hum Evol.* 2013;65: 457–464.
4. Langley MC, Taçon PSC. The age of Australian rock art: A review. *Aust Archaeol.* 2010;71: 70–73. doi:10.1080/03122417.2010.11689386
5. Steelman KL, Ramírez FC, Valcarce RF, Guilderson T, Rowe MW. Direct radiocarbon dating of megalithic paintings from north-west Iberia. *Antiquity.* 2005;79: 379–389.
6. Thackeray AI. Dating the rock art of southern Africa. *Goodwin Ser.* 1983;4: 21–26. doi:10.2307/3858098
7. Bednarik RG, Kumar G, Watchman A, Roberts RG. Preliminary results of the EIP Project. 2005. Available: <http://ro.uow.edu.au/scipapers/3611/>
8. Mazel AD, Watchman AL. Dating rock paintings in the uKhahlamba-Drakensberg and the Biggarsberg, KwaZulu-Natal, South Africa. *South Afr Humanit.* 2003;15: 59–73.
9. Francis JE, Loendorf LL, Dorn RI. AMS radiocarbon and cation-ratio dating of rock art in the Bighorn Basin of Wyoming and Montana. *Am Antiq.* 1993;58: 711–737.
10. Taçon PS, Boivin N, Petraglia M, Blinkhorn J, Chivas A, Roberts RG, et al. Mid-Holocene age obtained for nested diamond pattern petroglyph in the Billasurgam Cave complex, Kurnool District, southern India. *J Archaeol Sci.* 2013;40: 1787–1796.
11. Watchman A, Cole N. Accelerator radiocarbon dating of plant-fibre binders in rock paintings from northeastern Australia. *Antiquity.* 1993;67: 355–358. doi:10.1017/S0003598X00045415
12. Bendrey R. Review of Wadi Sura—The Cave of Beasts edited by Rudolph Kuper. *Pastoralism.* 2014;4: 2. doi:10.1186/2041-7136-4-2
13. Valladas H, Clottes J, Geneste J-M, Garcia MA, Arnold M, Cachier H, et al. Palaeolithic paintings: Evolution of prehistoric cave art. *Nat Lond.* 2001;413: 479. doi:<http://dx.doi.org/10.1038/35097160>
14. Pike AWG, Hoffmann DL, García-Diez M, Pettitt PB, Alcolea J, Balbín RD, et al. U-series dating of paleolithic art in 11 caves in Spain. *Science.* 2012;336: 1409–1413. doi:10.1126/science.1219957
15. Valladas H, Cachier H, et al. Direct radiocarbon dates for prehistoric paintings at the Altamira, El Castillo and Niaux caves. *Nat Lond.* 1992;357: 68.
16. Valladas H, Tisnérat-Laborde N, Cachier H, Arnold M, Quirós FB de, Cabrera-Valdés V, et al. Radiocarbon AMS Dates for paleolithic cave paintings. *Radiocarbon.* 2001;43: 977–986. doi:10.1017/S0033822200041643
17. Butzer KW, Fock GJ, Scott L, Stuckenrath R. Dating and context of rock engravings in southern Africa. *Science.* 1979;203: 1201–1214.
18. Zorich Z. From the Trenches - Drawing Paleolithic Romania - Archaeology Magazine Archive. [cited 20 Jul 2017]. Available: [http://archive.archaeology.org/1201/trenches/coliboaia\\_cave\\_romania\\_charcoal\\_drawings.html](http://archive.archaeology.org/1201/trenches/coliboaia_cave_romania_charcoal_drawings.html)
19. Huyge D, Watchman A, De Dapper M, Marchi E. Dating Egypt's oldest 'art': AMS 14C age determinations of rock varnishes covering petroglyphs at El-Hosh (Upper Egypt). *Antiquity.* 2001;75: 68–72.
20. Mercier N, Valladas H, Aubry T, Zilhão J, Jorons JL, Reyss J-L, et al. Fariseu: first confirmed open-air palaeolithic parietal art site in the Côa Valley (Portugal). *Antiquity.* 2006;80. Available: <http://www.antiquity.ac.uk/projgall/mercier/>
21. Sand C, Valladas H, Cachier H, Tisnérat-Laborde N, Arnold M, Bolé J, et al. Oceanic rock art: first direct dating of prehistoric stencils and paintings from New Caledonia (Southern Melanesia). *Antiquity.* 2006;80: 523–529.
22. Watchman A. A review of the theory and assumptions in the AMS dating of the Foz Côa petroglyphs, Portugal. *Rock Art Res.* 1996;13: 21–29.
23. Moure Romanillo A, Gonzalez Morales M. Datation 14C d'une zone décorée de la grotte Fuente del Salin. *Int Newsl Rock Art - INORA.* 1992.
24. Clottes J, Valladas H, Cachier H, Arnold M. Des dates pour Niaux et Gargas. *Bull Société Préhistorique Fr.* 1992;89: 270–274. doi:10.3406/bspf.1992.9532
25. Geib PR, Fairley HC. Radiocarbon Dating of Fremont Anthropomorphic Rock Art in Glen Canyon, South-central Utah. *J Field Archaeol.* 1992;19: 155–168. doi:10.1179/009346992791548932
26. Valladas H, Kaltnecker E, Quiles A, Tisnérat-Laborde N, Genty D, Arnold M, et al. Dating French and Spanish prehistoric decorated caves in their archaeological contexts. *Radiocarbon.* 2013;55: 1422–1431. doi:10.1017/S0033822200048359

27. Broglio A, De Stefani M, Gurioli F, Pallecchi P, Giachi G, Higham T, et al. L'art aurignacien dans la décoration de la Grotte de Fumane. *L'Anthropologie*. 2009;113: 753–761. doi:10.1016/j.anthro.2009.09.016
28. Ambert P, Guendon J-L, Galant P, Quinif Y, Gruneisen A, Colomer A, et al. Attribution des gravures paléolithiques de la grotte d'Aldène (Cesseras, Hérault) à l'Aurignacien par la datation des remplissages géologiques. /data/revues/16310683/00040003/04001691/. [cited 25 Jul 2017]. Available: <http://www.em-consulte.com/en/article/30133>
29. Jaubert J, Genty D, Valladas H, Camus H, Courtaud P, Ferrier C, et al. The chronology of human and animal presence in the decorated and sepulchral cave of Cussac (France). *Quat Int*. 2017;432: 5–24. doi:10.1016/j.quaint.2016.01.052
30. Plagnes V, Causse C, Fontugne M, Valladas H, Chazine J-M, Fage L-H. Cross dating (Th/U-14 C) of calcite covering prehistoric paintings in Borneo. *Quat Res*. 2003;60: 172–179.
31. Nelson DE, Chaloupka G, Chippindale C, Alderson MS, Southon JR. Radiocarbon dates for beeswax figures in the prehistoric rock art of Northern Australia. *Archaeometry*. 1995;37: 151–156. doi:10.1111/j.1475-4754.1995.tb00733.x
32. Steelman KL, Rowe MW, Shirokov VN, Southon JR. Radiocarbon dates for pictographs in Ignatievskaya Cave, Russia: Holocene age for supposed Pleistocene fauna. *Antiquity*. 2002;76: 341–348. doi:10.1017/S0003598X00090426
33. Taçon PS, Aubert M, Gang L, Decong Y, Hong L, May SK, et al. Uranium-series age estimates for rock art in southwest China. *J Archaeol Sci*. 2012;39: 492–499.
34. Stasack E, Dorn RI, Lee G. First direct 14C ages on Hawaiian petroglyphs. *Asian Perspect*. 1996;35: 51–72.
35. Shchelinsky VE. Some results of new investigations at the Kapova Cave in the southern Urals. *Proc Prehist Soc*. 1989;55: 181–191. doi:10.1017/S0079497X00005387
36. Neves WA, Araujo AGM, Bernardo DV, Kipnis R, Feathers JK. Rock art at the pleistocene/holocene boundary in eastern South America. Petraglia MD, editor. *PLoS ONE*. 2012;7: e32228. doi:10.1371/journal.pone.0032228
37. O'Connor S, Aplin K, Pierre ES, Feng Y. Faces of the ancestors revealed: discovery and dating of a Pleistocene-age petroglyph in Lene Hara Cave, East Timor. *Antiquity*. 2010;84: 649–665. doi:10.1017/S0003598X00100146
38. Russ J, Hyman M, Rowe M. Direct radiocarbon dating of rock art. *Radiocarbon*. 1992;34: 867–872.
39. di Lernia S, Gallinaro M. The date and context of neolithic rock art in the Sahara: engravings and ceremonial monuments from Messak Settafet (south-west Libya). *Antiquity*. 2010;84: 954–975.
40. Mazel AD, Watchman AL. Accelerator radiocarbon dating of Natal Drakensberg paintings: results and implications. *Antiquity*. 1997;71: 445–449.
41. David B, Barker B, Petchey F, Delannoy J-J, Geneste J-M, Rowe C, et al. A 28,000 year old excavated painted rock from Nawarla Gabarnmang, northern Australia. *J Archaeol Sci*. 2013;40: 2493–2501. doi:10.1016/j.jas.2012.08.015
42. Corchón Rodríguez MS, Valladas H, Bécades Pérez J, Arnold M, Tisnerat N, Cachier H. Datación de las pinturas y revisión del Arte Paleolítico de Cueva Palomera (Ojo Guareña, Burgos, España). 2009. Available: <https://gredos.usal.es/jspui/handle/10366/70469>
43. Thaw UA. The “neolithic” culture of the Padah-lin Caves. *Asian Perspect*. 1971;14: 123–133.
44. Roosevelt AC, Lima da Costa M, Lopes Machado C, Michab M, Mercier N, Valladas H, et al. Paleoindian cave dwellers in the Amazon: the peopling of the Americas. *Sci-N Y THEN Wash-*. 1996; 373–384.
45. Mulvaney K. Dating the Dreaming: extinct fauna in the petroglyphs of the Pilbara region, Western Australia. *Archaeol Ocean*. 2009;44: 40–48.
46. Sauvet G. À la recherche du temps perdu. Méthodes de datations en art préhistorique. Available: [https://www.researchgate.net/profile/Georges\\_Sauvet2/publication/289376793\\_A\\_la\\_recherche\\_du\\_temps\\_perdu\\_methodes\\_de\\_datations\\_en\\_art\\_prehistorique\\_L'exemple\\_des\\_sites\\_aurignaciens/links/568c0e1f08ae197e42689524.pdf](https://www.researchgate.net/profile/Georges_Sauvet2/publication/289376793_A_la_recherche_du_temps_perdu_methodes_de_datations_en_art_prehistorique_L'exemple_des_sites_aurignaciens/links/568c0e1f08ae197e42689524.pdf)
47. Huyge D, Vandenberghe DA, De Dapper M, Mees F, Claes W, Darnell JC. First evidence of Pleistocene rock art in North Africa: securing the age of the Qurta petroglyphs (Egypt) through OSL dating. *Antiquity*. 2011;85: 1184–1193.
48. Pike AWG, Gilmour M, Pettitt P, Jacobi R, Ripoll S, Bahn P, et al. Verification of the age of the Palaeolithic cave art at Creswell Crags, UK. *J Archaeol Sci*. 32: 1649–1655.
49. Bonneau A, Brock F, Higham T, Pearce DG, Pollard AM. An improved pretreatment protocol for radiocarbon dating black pigments in San rock art. *Radiocarbon*. 2011;53: 419–428.
50. Cole N, Watchman A. AMS dating of rock art in the Laura Region, Cape York Peninsula, Australia—protocols and results of recent research. *Antiquity*. 2005;79: 661–678.

51. Fontugne M, Shao Q, Frank N, Thiffaut I, Guidon N, Boeda E. Cross-Dating (Th/U-14 C) of Calcite Covering Prehistoric Paintings at Serra da Capivara National Park, Piauí, Brazil. *Radiocarbon*. 2013;55: 1191–1198.
52. Jerardino A, Swanepoel N. Painted Slabs from Steenbokfontein Cave: The Oldest Known Parietal Art in Southern Africa. *Curr Anthropol*. 1999;40: 542–547. doi:10.1086/200051
53. Aubert M, Brumm A, Ramli M, Sutikna T, Saptomo EW, Hakim B, et al. Pleistocene cave art from Sulawesi, Indonesia. *Nature*. 2014;514: 223.
54. Hachid M, Le Quellec J-L, Amara A, Beck L, Heddouche A, Kaltnecker E, et al. Quelques résultats du projet de datation directe et indirecte de l'art rupestre saharien. *Signs Which Times*. 2012; 71–96.
55. Simek JF, Cressler A, Herrmann NP, Sherwood SC. Sacred landscapes of the south-eastern USA: prehistoric rock and cave art in Tennessee. *Antiquity*. 2013;87: 430–446.
56. Bednarik RG. An overview of Asian palaeoart of the Pleistocene. Proceedings of the IFRAO Congress. 2010. Available: <http://www.ifrao.com/wp-content/uploads/2015/08/12Asia2.pdf>
57. Dorn RI, Clarkson PB, Nobbs MF, Loendorf LL, Whitley DS. New Approach to the Radiocarbon Dating of Rock Varnish, with Examples from Drylands. *Ann Assoc Am Geogr*. 1992;82: 136–151.
58. Benson LV, Hattori EM, Southon J, Aleck B. Dating North America's oldest petroglyphs, Winnemucca Lake subbasin, Nevada. *J Archaeol Sci*. 2013;40: 4466–4476.
59. Thackeray AI, Thackeray JF, Beaumont PB, Vogel JC. Dated rock engravings from Wonderwerk Cave, South Africa. *Science*. 1981;214: 64–67. doi:10.1126/science.214.4516.64
