# Supplementary material for: Stabilization of cultural innovations depends on population density: testing an epidemiological model of cultural evolution against a global dataset of rock art sites and climate-based estimates of ancient population densities
Source: bioRxiv or medRxiv preprint supplement (doi:10.1101/705137), 2020-06-08
Supplement: Supplementary file [file media-1.pdf]

**Supplementary Table 1: Rock art dataset**

| Name                                                                                                                 | Latitude   | Longitude   | Earliest age in sample | Latest age in sample | Modern Country | Date of reference | Dating methods             | Direct / indirect | Exact Age / Minimum Age / Max Age | Calibrated | Kind                                     | Figurative | Reference |
|----------------------------------------------------------------------------------------------------------------------|------------|-------------|------------------------|----------------------|----------------|-------------------|----------------------------|-------------------|-----------------------------------|------------|------------------------------------------|------------|-----------|
| Abri Castanet, Dordogne, France                                                                                      | 44.999272  | 1.101261    | 37'205                 | 36'385               | France         | 2012              | Radiocarbon                | Indirect          | Minimum Age                       | No         | Petroglyphs                              | Yes        | (28)      |
| Altamira, Spain                                                                                                      | 43.377452  | -4.122347   | 36'160                 | 2'850                | Spain          | 2013              | Uranium-series             | Direct            | Exact Age                         | Unknown    | Petroglyphs<br>Decorated ceiling in cave | Yes        | (29)      |
| Altxerri B, Spain                                                                                                    | 43.2369    | -2.148555   | 39'479                 | 34'689               | Spain          | 2013              | Radiocarbon                | Indirect          | Minimum age                       | Yes        | Painting                                 | Yes        | (30)      |
| Anbarndarr I, Australia/Anbarndarr II, Australia/Gunbirdi I, Gunbirdi II, Gunbirdi III, Northern Territory Australia | -12.255207 | 133.645845  | 1'704                  | 111                  | Australia      | 2010              | Radiocarbon                | Direct            | Exact age                         | Yes        | Beeswax                                  | No         | (31)      |
| Anta de Serramo, Vimianzo, A Coruña, Galicia, Spain                                                                  | 43.110048  | -9.03242    | 6'950                  | 6'950                | Spain          | 2005              | Radiocarbon                | Direct            | Exact age                         | Yes        | Painting                                 | N/A        | (32)      |
| Apollo 11 Cave, !Karas Region, Namibia                                                                               | -26.842964 | 17.290284   | 28'400                 | 26'300               | Namibia        | 1983              | Radiocarbon                | Indirect          | Minimum age                       | Unknown    | Painted fragments                        | Yes        | (33)      |
| ARN- 0063, Namarrgon Lightning Man, Northern Territory, Australia                                                    | -12.865524 | 132.814001  | 1'021                  | 145                  | Australia      | 2010              | Radiocarbon                | Direct            | Exact age                         | Yes        | Beeswax                                  | Yes        | (31)      |
| Bald Rock, Wellington Range, Northern Territory Australia                                                            | -11.8      | 133.15      | 386                    | 174                  | Australia      | 2010              | Radiocarbon                | Direct            | Exact age                         | Yes        | Beeswax                                  | N/A        | (31)      |
| Baroalba Springs, Kakadu, Northern Territory, Australia                                                              | -12.677013 | 132.480901  | 7'876                  | 7'876                | Australia      | 2010              | Radiocarbon                | Indirect          | Minimum age                       | Yes        | Painting                                 | N/A        | (31)      |
| Bhimbetka, India                                                                                                     | 22.939546  | 77.612433   | 5'190                  | 1'100                | India          | 2005              | Radiocarbon                | Direct            | Exact Age                         | N/A        | Painting                                 | Yes        | (34)      |
| Biggarsberg, South Africa                                                                                            | -26.286668 | 28.047223   | 4'050                  | 970                  | South Africa   | 2003              | Radiocarbon                | Direct            | Exact age                         | N/A        | Painting                                 | N/A        | (35)      |
| Bighorn Basin, Wyoming and Montana, USA                                                                              | 44.379957  | -108.038989 | 6'862                  | Modern               | USA            | 1993              | Radiocarbon                | Direct            | Exact age                         | Yes        | Petroglyphs                              | N/A        | (36)      |
| Billasurgam, Kurnool, Andhra Pradesh, India                                                                          | 15.828126  | 78.037279   | 5'620                  | 4'825                | India          | 2012              | Radiocarbon                | Indirect          | Minimum Age                       | N/A        | Petroglyph                               | No         | (37)      |
| Bindu, Kakadu, Northern Territory, Australia                                                                         | -12.677013 | 132.480901  | 183                    | 117                  | Australia      | 2010              | Radiocarbon                | Direct            | Exact age                         | Yes        | Beeswax dots and lines                   | No         | (31)      |
| Bush Turkey Dreaming Site, Western Australia                                                                         | -23.96     | 122.97      | 60                     | 60                   | Australia      | 2010              | Radiocarbon                | Direct            | Exact age                         | Yes        | Painting                                 | Yes        | (31)      |
| Cape York, Australia                                                                                                 | -10.7      | 142.516667  | 730                    | 725                  | Australia      | 1993              | Radiocarbon                | Direct            | Exact age                         | N/A        | Painting                                 | N/A        | (38)      |
| Casota do Paramo, A Coruña, Spain                                                                                    | 42.704644  | -8.930863   | 5'400                  | 5'400                | Spain          | 2005              | Radiocarbon                | Direct            | Maximum Age                       | Yes        | Painting                                 | No         | (32)      |
| Cave of Beasts, Gifl Kebir, Egypt                                                                                    | 23.441389  | 25.839722   | 8'450                  | 6'350                | Egypt          | 2014              | Radiocarbon                | Indirect          | N/A                               | N/A        | Painting                                 | Yes        | (39)      |
| Cave of Bees, Matopos, Zimbabwe                                                                                      | -20.557222 | 28.5125     | 10'500                 | 10'500               | South Africa   | 1983              | Radiocarbon                | Direct            | Exact age                         | N/A        | Painting                                 | N/A        | (33)      |
| Cave of Cougnac, France                                                                                              | 44.756986  | 1.375957    | 24'000                 | 24'000               | France         | 2001              | Radiocarbon                | Direct            | Exact Age                         | N/A        | Painting                                 | Yes        | (40)      |
| Cave of El Castillo, Spain                                                                                           | 43.292368  | -3.965576   | 41'400                 | 22'880               | Spain          | 2012, 2001, 1992  | Uranium Series             | Direct            | Minimum Age                       | Yes        | Pike: Painting                           | Yes        | (41)      |
| Cave of Niaux, France                                                                                                | 42.820098  | 1.593487    | 12'890                 | 12'890               | France         | 1992              | Radiocarbon                | Direct            | Exact age                         | N/A        | Painting                                 | Yes        | (42)      |
| Chauvet-Pont-d'Arc Cave, France                                                                                      | 44.387244  | 4.415865    | 32'410                 | 30'340               | France         | 2001              | Radiocarbon                | Direct            | Exact age                         | N/A        | Painting                                 | Yes        | (43)      |
| Chifubwa Stream Shelter, Zambia                                                                                      | -12.2      | 26.683333   | 6'300                  | 6'300                | Zambia         | 1979              | Radiocarbon                | Indirect          | Minimum age                       | No         | Engraving                                | No         | (44)      |
| Coliboaia Cave, Romania                                                                                              | 46.53089   | 22.597332   | 32'000                 | 32'000               | Romania        | 2012              | Radiocarbon                | Direct            | Exact age                         | N/A        | Drawings                                 | Yes        | (45)      |
| Cosquer cave, Calanque de Morgiou, France                                                                            | 43.210931  | 5.445896    | 28'370                 | 17'800               | France         | 2001              | Radiocarbon                | Direct            | Exact Age                         | No         | Painting                                 | Yes        | (43)      |
| Coto dos Muros, Baixo Miño, Spain                                                                                    | 41.999517  | -8.770147   | 6'340                  | 4'020                | Spain          | 2005              | Radiocarbon                | Direct            | Maximum Age                       | Yes        | Painting                                 | N/A        | (32)      |
| Covaciella, Spain                                                                                                    | 43.318232  | -4.875262   | 17'113                 | 16'881               | Spain          | 2001              | Radiocarbon                | Yes               | Exact age                         | Yes        | Painting                                 | Yes        | (43)      |
| Deighton Lady, Jowalbinna, Queensland Australia                                                                      | -15.5333   | 144.7833    | 6'483                  | 2'905                | Australia      | 2010              | Radiocarbon                | Indirect          | Minimum age                       | Yes        | Engraving                                | No         | (31)      |
| Djarrng, West Arnhem Land, Northern Territory, Australia                                                             | -12.091834 | 132.890495  | 720                    | 119                  | Australia      | 2010              | Radiocarbon                | Direct            | Exact age                         | Yes        | Beeswax                                  | Yes        | (31)      |
| Djulirri, Arnhem Land, Northern Territory, Australia                                                                 | -12.091834 | 132.890495  | 383                    | 172                  | Australia      | 2010              | Radiocarbon                | Direct            | Exact age                         | Yes        | Beeswax                                  | Yes        | (31)      |
| East Alligator River, Northern Territory, Australia                                                                  | -12.525429 | 133.060161  | 4'287                  | 122                  | Australia      | 2010              | Radiocarbon                | Direct            | Exact age                         | Yes        | Beeswax                                  | No         | (31)      |
| Echidna's Rest, Queensland, Australia                                                                                | -27.542345 | 153.07315   | 1'291                  | Modern               | Australia      | 2010              | Radiocarbon                | Direct            | Exact age                         | Yes        | Drawings and engraving                   | No         | (31)      |
| El Hosh, Egypt                                                                                                       | 24.642614  | 32.92968    | 7'550                  | 2'325                | Egypt          | 2001              | Direct radiocarbon dating  | Direct            | Exact Age                         | Yes        | Petroglyphs                              | Yes        | (46)      |
| Emu Cave, New South Wales, Australia                                                                                 | -33.782342 | 150.590426  | 1'857                  | 1'857                | Australia      | 2010              | Radiocarbon                | Indirect          | Minimum age                       | Yes        | Engraving                                | Yes        | (31)      |
| Fáriseu, Coa Valley, Portugal                                                                                        | 41.079991  | -7.111782   | 18'400                 | 10'800               | Portugal       | 2006              | Optical Luminescence (OSL) | Indirect          | Minimum age                       | No         | Petroglyphs                              | Yes        | (47)      |
| Fetra Hé Cave, Lifou Island, New Caledonia                                                                           | -21.038497 | 167.240515  | 2'570                  | 983                  | New Caledonia  | 2006              | Radiocarbon                | Direct            | Exact age                         | Yes        | Hand stencils                            | Some       | (48)      |

Supplementary Table 1: Rock art dataset

| Name                                                                         | Latitude   | Longitude   | Earliest age in sample | Latest age in sample | Modern Country | Date of reference | Dating methods                             | Direct / indirect | Exact Age / Minimum Age / Max Age | Calibrated | Kind                       | Figurative | Reference |
|------------------------------------------------------------------------------|------------|-------------|------------------------|----------------------|----------------|-------------------|--------------------------------------------|-------------------|-----------------------------------|------------|----------------------------|------------|-----------|
| Forno dos muros, Portugal                                                    | 40.224238  | -8.636221   | 5'840                  | 5'505                | Portugal       | 2005              | Radiocarbon                                | Direct            | Exact age                         | Yes        | Painting                   | N/A        | (32)      |
| Foz Coa, Portugal                                                            | 41.082247  | -7.14036    | 2'000                  | 100                  | Portugal       | 1996              | Radiocarbon                                | Indirect          | Minimum age                       | No         | Petroglyphs                | Yes        | (49)      |
| Fuente del Salin, Muñorrodero Spain                                          | 43.364429  | -4.482981   | 22'340                 | 22'340               | Spain          | 2017              | Radiocarbon                                | Indirect          | Minimum age                       | N/A        | Painting                   | N/A        | (50)      |
| Gargas, France                                                               | 43.90322   | 5.357388    | 26'860                 | 26'860               | France         | 1992              | Radiocarbon                                | Indirect          | Minimum age                       | N/A        | Hand stencils, engravings  | Yes        | (51)      |
| Giant Horse, Laura, Queensland, Australia                                    | -15.5384   | 144.4566    | 474                    | 474                  | Australia      | 2010              | Radiocarbon                                | Direct            | Exact age                         | Yes        | Painting                   | N/A        | (31)      |
| Glen Canyon, South-central Utah, USA                                         | 37.386989  | -110.842823 | 1'080                  | 675                  | USA            | 1992              | Radiocarbon                                | Indirect          | N/A                               | N/A        | Painting                   | Yes        | (52)      |
| Grande Grotte, Arcy-sur-Cure, France                                         | 47.591452  | 3.766392    | 45'504                 | 29'173               | France         | 2013              | Radiocarbon                                | Indirect          | N/A                               | Yes        | Painting                   | N/A        | (53)      |
| Grotta di Fumane, Italy                                                      | 45.592481  | 10.90443    | 41'000                 | 41'000               | Italy          | 2009              | Radiocarbon                                | Indirect          | Exact Age                         | Yes        | Painting                   | Yes        | (54)      |
| Grotte d'Aldène, Cessero, France                                             | 43.353897  | 2.698387    | 30'260                 | 30'260               | France         | 2005              | Radiocarbon                                | Indirect          | N/A                               | N/A        | Engravings                 | N/A        | (55)      |
| Grotte de Cussac, Dordogne River Valley, France                              | 44.829444  | 0.847778    | 29'209                 | 3'426                | France         | 2017              | Uranium series & radiocarbon               | Indirect          | Mixed                             | N/A        | Painting                   | Yes        | (56)      |
| Gua Saleh, Sangkuliran - Mangkalahat Peninsula, Kalimantan Island, Indonesia | 1.035717   | 118.065445  | 27'270                 | 9'820                | Indonesia      | 2003              | Uranium series & radiocarbon               | Indirect          | Minimum age                       | Yes        | Paintings                  | Yes        | (57)      |
| Gunblingmurrung, Australia                                                   | -12.8      | 133.3       | 3'870                  | 140                  | Australia      | 2010              | Radiocarbon                                | Direct            | Exact Age                         | Yes        | Beeswax                    | Yes        | (58)      |
| Hathitol, India                                                              | 23.152243  | 79.920672   | 4'810                  | 2'780                | India          | 2005              | Radiocarbon                                | Direct            | Exact Age                         | N/A        | Painting                   | Yes        | (27)      |
| Hay Cave, Queensland, Australia                                              | -23.167328 | 150.490387° | 2'420                  | 1'010                | Australia      | 2010              | Radiocarbon                                | Direct            | Exact age                         | No         | Painting                   | No         | (31)      |
| Ignatievskaya Cave, Russia                                                   | 54.899497  | 57.781586   | 8790                   | 6925                 | Russia         | 2002              | Radiocarbon                                | Direct            | Exact Age                         | N/A        | Painting                   | Yes        | (59)      |
| Ingaladdi, willeroo, Northern Territory, Australia                           | -15.29028  | 131.575195  | 7'676                  | 7'676                | Australia      | 2010              | Radiocarbon                                | Indirect          | Minimum age                       | Yes        | Engraving                  | N/A        | (31)      |
| Jamjori, India                                                               | 24.515475  | 87.081156   | 1'720                  | 1'720                | India          | 2005              | Radiocarbon                                | Direct            | Exact Age                         | N/A        | Painting                   | No         | (27)      |
| Jinsha, China                                                                | 26.855047  | 100.22775   | 5'216                  | 5'216                | China          | 2012              | Uranium series                             | Indirect          | Maximum Age                       | N/A        | Painting                   | Yes        | (60)      |
| Kaalpi site, Western Australia                                               | -23.95     | 122.72      | 377                    | 308                  | Australia      | 2010              | Radiocarbon                                | Direct            | Exact age                         | Yes        | Painting                   | N/A        | (31)      |
| Kaho'olawe, Hawai'i, USA                                                     | 20.558047  | -156.605738 | 923                    | Modern               | Hawaii         | 1996              | Radiocarbon                                | Indirect          | Minimum age                       | Yes        | Painting                   | Yes        | (61)      |
| Kapova cave, Russia                                                          | 53.043799  | 57.065139   | 14'680                 | 13'930               | Russia         | 1989              | Radiocarbon                                | Indirect          | N/A                               | N/A        | Painting                   | Yes        | (62)      |
| Kennedy River, Queensland, Australia                                         | -15.5906   | 144.0308    | 1'132                  | 1'132                | Australia      | 2010              | Radiocarbon                                | Indirect          | Minimum age                       | Yes        | Engraving                  | Yes        | (31)      |
| Kimberley, Australia                                                         | -17.34918  | 125.915207  | 4'300                  | 1'350                | Australia      | 2010              | Radiocarbon                                | Direct            | Exact age                         | Yes        | Painting                   | Yes        | (31)      |
| La Garma, Cantabria, Spain                                                   | 43.151944  | -3.896389   | 16'875                 | 16'875               | Spain          | 2013              | Radiocarbon                                | Direct            | Exact age                         | Yes        | Paintings                  | Yes        | (53)      |
| La Pileta, Spain                                                             | 36.691297  | -5.2699     | 24'228                 | 24'228               | Spain          | 2013              | Radiocarbon                                | Direct            | Exact age                         | Yes        | Paintings                  | Yes        | (53)      |
| La Tête du lion, France                                                      | 45.777403  | 4.855214    | 26'760                 | 25'997               | France         | 2013              | Radiocarbon                                | Indirect          | Minimum age                       | Yes        | Paintings                  | N/A        | (53)      |
| Labastide, France                                                            | 43.035546  | 0.352267    | 17'476                 | 484                  | France         | 2013              | Radiocarbon                                | Direct            | Exact age                         | Yes        | Paintings                  | Yes        | (53)      |
| Lapa do Santo, Brazil                                                        | -19.477778 | -44.038889  | 10'600                 | 10'600               | Brazil         | 2012              | Radiocarbon and Optical Luminescence (OSL) | Yes               | Exact age                         | Yes        | Petroglyph                 | Yes        | (63)      |
| Lascaux Cave, France                                                         | 45.053919  | 1.167651    | 22'723                 | 18'848               | France         | 2013              | Radiocarbon                                | Indirect          | Minimum age                       | Yes        | Paintings                  | Yes        | (53)      |
| Lene Hara Cave, East Timor                                                   | -8.411695  | 127.293235  | 11'350                 | 11'350               | East Timor     | 2007              | Uranium series                             | Direct            | Exact age                         | Yes        | Paintings                  | N/A        | (64)      |
| Lower Pecos, Texas                                                           | 31.422912  | -103.493229 | 3'865                  | 3'865                | USA            | 1995              | Radiocarbon                                | Direct            | Exact Age                         | N/A        | Painting                   | N/A        | (65)      |
| M23, Calvert Ranges, Western Australia                                       | -23.966667 | 122.966667  | 2'085                  | 759                  | Australia      | 2010              | Radiocarbon                                | Direct            | Exact age                         | Yes        | Painting                   | N/A        | (31)      |
| Malangine Cave, Nene Valley, South Australia                                 | -38.05     | 140.69      | 6'348                  | 5'046                | Australia      | 2010              | Radiocarbon                                | Indirect          | Minimum age                       | Yes        | Figure Fluting & Engraving | No         | (31)      |
| Mámoa do Monte: Dos Marxos, Portugal                                         | 42.648475  | -7.946347   | 6'110                  | 5'495                | Portugal       | 2005              | Radiocarbon                                | Direct            | Exact age                         | Yes        | Painting                   | N/A        | (32)      |
| Marjar - East Alligator, Northern territory, Australia                       | -13.092293 | 132.393766  | 191                    | 191                  | Australia      | 2010              | Radiocarbon                                | Direct            | Exact age                         | Yes        | Beeswax                    | N/A        | (31)      |
| Menngye-ya 1, Northern Territory                                             | -15.29028  | 131.575195  | 4'010                  | 4'010                | Australia      | 2010              | Radiocarbon                                | Indirect          | Minimum age                       | No         | Engraving                  | No         | (31)      |
| Messak Plateau, Fezzan, Libya                                                | 25.75      | 11.833333   | 6'080                  | 5'150                | Libya          | 2010              | Radiocarbon                                | Indirect          | N/A                               | No         | Engraving                  | N/A        | (66)      |
| Mickey Springs 31, Hughenden, Queensland, Australia                          | -20.85     | 144.2       | 5'929                  | 5'929                | Australia      | 2010              | Radiocarbon                                | N/A               | N/A                               | Yes        | Engraving                  | No         | (31)      |
| Moonface site, Queensland, Australia                                         | -21.5097   | 140.6679    | 796                    | 796                  | Australia      | 2010              | Radiocarbon                                | Direct            | Exact age                         | Yes        | Painting                   | Yes        | (31)      |
| Moses Cave, Arnhem Land, Northern Territory, Australia                       | -12.430204 | 130.882379  | 274                    | 274                  | Australia      | 2010              | Radiocarbon                                | Direct            | Exact age                         | Yes        | Beeswax                    | No         | (31)      |
| Mount Manning, Western Australia                                             | -30.12203  | 119.742604  | 586                    | 182                  | Australia      | 2010              | Radiocarbon                                | Indirect          | N/A                               | Yes        | Drawing                    | No         | (31)      |
| Mungana Site, Queensland, Australia                                          | -17.118416 | 144.398988  | 3'644                  | 1'177                | Australia      | 2010              | Radiocarbon                                | Direct            | Exact age                         | Yes        | Drawing                    | No         | (31)      |
| Nangalor (Nanguluwur), Kakadu National Park, Northern Territory, Australia   | -13.092293 | 132.393766  | 5'570                  | 776                  | Australia      | 2010              | Radiocarbon                                | Indirect          | Minimum Age                       | Yes        | Painting                   | No         | (31)      |
| Nara Inlet, Queensland, Australia                                            | -20.15°    | 148.9       | 2'489                  | 2'489                | Australia      | 2010              | Radiocarbon                                | N/A               | N/A                               | Yes        | N/A                        | N/A        | (31)      |
| Natal Drakkenberg, South Africa                                              | -29.466667 | 29.266667   | 675                    | 402                  | South Africa   | 1997              | Radiocarbon                                | Indirect          | N/A                               | Yes        | Painting                   | No         | (67)      |

**Supplementary Table 1: Rock art dataset**

| Name                                                           | Latitude    | Longitude  | Earliest age in sample | Latest age in sample | Modern Country | Date of reference | Dating methods             | Direct / indirect | Exact Age / Minimum Age / Max Age | Calibrated | Kind                        | Figurative | Reference |
|----------------------------------------------------------------|-------------|------------|------------------------|----------------------|----------------|-------------------|----------------------------|-------------------|-----------------------------------|------------|-----------------------------|------------|-----------|
| Nawaria Gabarnmang, Jawoyn Country, Arnhem Land Australia      | -12.1685    | 133.8335   | 27630                  | 27630                | Australia      | 2013              | Radiocarbon                | Direct            | Exact age                         | Yes        | Painting                    | N/A        | (68)      |
| Nerja, Spain                                                   | 36.785916   | -3.804483  | 23'821                 | 23'821               | Spain          | 2013              | Radiocarbon                | Indirect          | Minimum age                       | Yes        | Drawings and torch rubbings | N/A        | (53)      |
| Ngarradj Warde Djokkeng, Northern Territory, Australia         | -12.3       | 132.57     | 10'083                 | 9'171                | Australia      | 2010              | Radiocarbon                | Indirect          | Minimum age                       | Yes        | Painting                    | N/A        | (31)      |
| Ojo Guareña, Burgos, Spain                                     | 43.034337   | -3.66452   | 11'540                 | 10'950               | Spain          | 2009              | Radiocarbon                | Direct            | Exact age                         | N/A        | Paintings                   | Yes        | (69)      |
| Padahlin, Taunggyi District, Shan State, Myanmar               | 20.763697   | 96.920913  | 7'740                  | 1'750                | Myanmar        | 1971              | Radiocarbon                | Indirect          | N/A                               | N/A        | Painting                    | Yes        | (70)      |
| Painted Shelter, Queensland, Australia                         | -16.1295    | 144.1289   | 2'420                  | 2'420                | Australia      | 2010              | Radiocarbon                | Direct            | Exact Age                         | No         | Painting                    | Yes        | (31)      |
| Panaramitee, Flinders Ranges, Australia                        | -31.416667  | 138.75     | 43'140                 | 3'575                | Australia      | 2010              | Radiocarbon                | Indirect          | Minimum age                       | No         | Engraving                   | No         | (31)      |
| Pech Merle, France                                             | 44.507308   | 1.64408    | 24'700                 | 24'700               | France         | 2001              | Radiocarbon                | Direct            | Exact age                         | N/A        | Painting                    | Yes        | (40)      |
| Pedra Cuberta, Spain                                           | 43.089554   | -8.984605  | 5'775                  | 5'620                | Spain          | 2005              | Radiocarbon                | Direct            | Exact age                         | Yes        | Painting                    | Yes        | (32)      |
| Pedra da Moura, Vimianzo, A Coruña, Spain                      | 43.081351   | -8.977859  | 5'745                  | 5'745                | Spain          | 2005              | Radiocarbon                | Direct            | Exact age                         | Yes        | Painting                    | N/A        | (32)      |
| Pedra Pintada, Monte Alegre, Brazil                            | -2.051761   | 54.182912  | 11'145                 | 10'230               | Brazil         | 1996              | Radiocarbon                | Indirect          | Minimum age                       | No         | Painting                    | Yes        | (71)      |
| Pete's Chase, Queensland, Australia                            | -16.1295    | 144.1289   | 2'090                  | 310                  | Australia      | 2010              | Radiocarbon                | Direct            | Exact age                         | No         | Painting                    | Yes        | (31)      |
| Pilbara, Western Australia, Australia                          | -21.883333  | 116.766667 | 3'700                  | 2'600                | Australia      | 2009              | Radiocarbon                | Indirect          | Minimum age                       | Unknown    | Petroglyphs                 | Yes        | (72)      |
| Pomongwe Cave, Zimbabwe                                        | -20.547412° | 28.513674  | 4'810                  | 4'090                | Zimbabwe       | 1983              | Radiocarbon                | Direct            | Exact age                         | N/A        | Painting                    | N/A        | (33)      |
| Pondra, Cantabria, Spain                                       | 43.266475   | -3.423179  | 22'000                 | 22'000               | Spain          | 2013              | Optical Luminescence (OSL) | Indirect          | Minimum age                       | N/A        | Painting                    | Yes        | (73)      |
| Possum Cave, Queensland, Australia                             | -10.7°      | 142.516667 | 9'501                  | 2'217                | Australia      | 2010              | Radiocarbon                | Indirect          | Minimum age                       | Yes        | Engraving                   | No         | (31)      |
| Prung-Cart Cave, South Australia                               | -37.090413  | 140.829791 | 2'783                  | 1'076                | Australia      | 2010              | Radiocarbon                | Indirect          | Minimum age                       | Yes        | Figure fluting              | N/A        | (31)      |
| Purtijarra, Cleland Hills, Northern Territory, Australia       | -23.883333  | 130.866667 | 2'747                  | 548                  | Australia      | 2010              | Radiocarbon                | Indirect          | Minimum age                       | Yes        | Engraving                   | No         | (31)      |
| Quinkans B6 Rockshelter, Queensland, Australia                 | -15.6286    | 144.5308   | 2'999                  | 845                  | Australia      | 2010              | Radiocarbon                | Indirect          | Minimum Age                       | Yes        | Engraving & Painting        | No         | (31)      |
| Qurta, Egypt                                                   | 24.629167   | 32.9625    | 17'000                 | 10'000               | Egypt          | 2011              | Optical Luminescence (OSL) | Direct            | Exact Age                         | N/A        | Petroglyph                  | Yes        | (74)      |
| Racecourse Site, Queensland, Australia                         | -17.1747    | 144.4994   | 2'031                  | 2'031                | Australia      | 2010              | Radiocarbon                | Direct            | Exact Age                         | Yes        | Drawing                     | No         | (31)      |
| Red Lady, Queensland, Australia                                | -15.762116  | 144.257562 | 8'213                  | 8'213                | Australia      | 2010              | Radiocarbon                | Indirect          | Minimum Age                       | Yes        | Painting                    | Yes        | (31)      |
| Robin Hood Cave and Church Hole, Creswell Crags, UK            | 53.263491   | -1.193529  | 15'700                 | 13'200               | UK             | 2005              | Uranium series             | Indirect          | Minimum Age                       | Yes        | Engravings                  | Yes        | (75)      |
| RSA TYN2 , Drakensberg Mountains, Eastern Cape, South Africa   | -29.466667  | 29.266667  | 2'009                  | 1'971                | South Africa   | 2011              | Radiocarbon                | Direct            | Exact age                         | Yes        | Paintings                   | N/A        | (76)      |
| Sandy Creek 1 & 2, Queensland, Australia                       | -16         | 144        | 29'440                 | 2'964                | Australia      | 2005              | Radiocarbon                | Indirect          | Minimum Age                       | Yes        | Painting                    | Yes        | (77)      |
| Serpent's Glen 1, Wiluna, Western Australia                    | -25.216667  | 120.75     | 3'417                  | 377                  | Australia      | 2010              | Radiocarbon                | Direct            | Exact Age                         | Yes        | Painting                    | No         | (31)      |
| Serra de Capivara, Brazil                                      | -8.695278   | -42.586267 | 9'863                  | 1'028                | Brazil         | 2013              | Radiocarbon                | Indirect          | N/A                               | Yes        | Paintings                   | N/A        | (78)      |
| Snake Site, Cannon Hill, Northern Territory, Australia         | -12.3       | 132.57     | 563                    | 563                  | Australia      | 2010              | Radiocarbon                | Indirect          | Minimum age                       | Yes        | Painting                    | N/A        | (31)      |
| Spirit Cave, Anbangbang, Kakadu, Northern Territory, Australia | -12.865524  | 132.814001 | 14'182                 | 3'747                | Australia      | 2010              | Radiocarbon                | Indirect          | Minimum Age                       | Yes        | Painting                    | No         | (31)      |
| Split rock, Queensland, Australia                              | -15.6525    | 144.4975   | 7'433                  | 7'433                | Australia      | 2010              | Radiocarbon                | Direct            | Exact Age                         | Yes        | Painting                    | N/A        | (31)      |
| Steenbokfontein Cave, South Africa                             | -32.161667  | 18.333333  | 8'370                  | 2'200                | South Africa   | 1999              | Radiocarbon                | Indirect          | Minimum age                       | No         | Painting                    | No         | (79)      |
| Sturt Meadows, New South Wales, Australia                      | -31.11      | 140.4      | 12'237                 | 11'978               | Australia      | 2010              | Radiocarbon                | Indirect          | Minimum Age                       | Yes        | Engraving                   | N/A        | (31)      |
| Sulawesi, Indonesia                                            | -1.8479     | 120.5279   | 44'000                 | 17'770               | Indonesia      | 2014              | Uranium series             | Indirect          | Minimum age                       | Yes        | Hand stencils and paintings | Yes        | (80)      |
| Tassili-n-Ajjer, Algeria                                       | 25.813595   | 8.133856   | 8'237                  | 2'287                | Algeria        | 2012              | Radiocarbon                | Indirect          | N/A                               | Yes        | Paintings                   | Yes        | (81)      |
| Tennessee, Cumberland Plateau, USA                             | 35.949603   | -85.027047 | 5'698                  | N/A                  | USA            | 2013              | Radiocarbon                | Direct            | Exact Age                         | Yes        | Charcoal pictograph         | Yes        | (82)      |
| Tito Bustillo Cave, Spain                                      | 43.460706   | -5.067392  | 36'200                 | 29'650               | Spain          | 2012              | Uranium series             | Indirect          | Mixed                             | Yes        | Paintings                   | Yes        | (41)      |
| uKhalamba, South Africa                                        | -29.380485  | 29.546     | 4'050                  | 990                  | South Africa   | 2003              | Radiocarbon                | Indirect          | Maximum age                       | Yes        | Painting                    | Yes        | (35)      |
| Unnamed sites 1-3, Kimberley, Western Australia                | -17.34918   | 125.915207 | 23'800                 | Modern               | Australia      | 2010              | Radiocarbon                | Indirect          | Minimum Age                       | No         | Painting                    | Yes        | (31)      |
| Urdales, Spain                                                 | 43.368822   | -3.215635  | 15'223                 | 15'223               | Spain          | 2013              | Radiocarbon                | Direct            | Exact age                         | Yes        | Painting                    | Yes        | (53)      |
| Urkan-e-Rub, Lower Jordan Valley, Israel                       | 32.422877   | 35.302723  | 16'750                 | 16'750               | Israel         | 2010              | N/A                        | N/A               | N/A                               | N/A        | Engraving                   | No         | (83)      |
| Villars, France                                                | 45.442277   | 0.785135   | 21'735                 | 17'473               | France         | 2013              | Radiocarbon                | Direct            | Exact age                         | Yes        | Drawings and torch rubbings | No         | (53)      |

**Supplementary Table 1: Rock art dataset**

| Name                                                                                                                              | Latitude   | Longitude   | Earliest age in sample | Latest age in sample | Modern Country | Date of reference | Dating methods | Direct / indirect | Exact Age / Minimum Age / Max Age | Calibrated | Kind                  | Figurative | Reference |
|-----------------------------------------------------------------------------------------------------------------------------------|------------|-------------|------------------------|----------------------|----------------|-------------------|----------------|-------------------|-----------------------------------|------------|-----------------------|------------|-----------|
| Walkunder Arch Cave, Queensland, Australia                                                                                        | -17.2297   | 144.5169    | 34'254                 | 3'575                | Australia      | 2010              | Radiocarbon    | Indirect          | Maximum age                       | Yes        | Paintings & Engraving | N/A        | (31)      |
| Wanga East, Northern Territory, Australia                                                                                         | -24.19     | 131.4       | 8'093                  | 1'332                | Australia      | 2010              | Radiocarbon    | Indirect          | Minimum age                       | Yes        | Engraving             | Yes        | (31)      |
| Waterfall Cave, New South Wales, Australia                                                                                        | -35.42     | 150.11      | 604                    | N/A                  | Australia      | 2010              | Radiocarbon    | Direct            | Exact Age                         | Yes        | Painting              | No         | (31)      |
| Wharton Hill, Australia                                                                                                           | -32.64     | 139.77      | 36'400                 | 36'400               | Australia      | 1992              | Radiocarbon    | Indirect          | Minimum age                       | No         | Petroglyph            | Yes        | (84)      |
| Winnemucca Lake, Nevada, USA                                                                                                      | 40.12185   | -119.339623 | 12'500                 | 12'500               | USA            | 2013              | Radiocarbon    | Indirect          | Minimum age                       | Yes        | Painting              | No         | (85)      |
| Wonderwerk Cave, South Africa                                                                                                     | -27.84673  | 23.55418    | 10'200                 | 1'210                | South Africa   | 1981              | Radiocarbon    | Indirect          | Minimum age                       | N/A        | Engraving             | No         | (86)      |
| Wurik (Mann River E1002, 1004, 1005), Northern Territory, Australia/Yikarrakkal (Mann River A1005), Northern Territory, Australia | -12.219481 | 134.143519  | 646                    | 183                  | Australia      | 2010              | Radiocarbon    | Direct            | Exact Age                         | Beeswax    | Beeswax               | Yes        | (31)      |
| Yam Camp, Cape York, Queensland, Australia                                                                                        | -15.7823   | 144.2341    | 682                    | 602                  | Australia      | 2010              | Radiocarbon    | Direct            | Exact age                         | Yes        | Painting              | Yes        | (31)      |
| Yiwariaray, Northern Territory, Australia                                                                                         | -12.36686  | 130.88125   | 4'592                  | 3'386                | Australia      | 2010              | Radiocarbon    | Indirect          | Minimum age                       | Yes        | Engraving             | Yes        | (31)      |
| Yunta Springs, South Australia                                                                                                    | -32.54     | 139.55      | 17'020                 | 1'398                | Australia      | 2010              | Radiocarbon    | Indirect          | Minimum age                       | Yes        | Engraving             | Mixed      | (31)      |
