# Supplementary material for: Stabilization of cultural innovations depends on population density: testing an epidemiological model of cultural evolution against a global dataset of rock art sites and climate-based estimates of ancient population densities
Source: bioRxiv or medRxiv preprint supplement (doi:10.1101/705137), 2020-06-08
Supplement: Supplementary file [file media-2.pdf]

**Supplementary Table 2: Detailed analysis results**

| Analysis                               | N sites | N. Globals | Median population density Sites | Median population density Globals | Threshold CI 0.025 | Threshold CI 0.25 | Threshold CI 0.5 | Threshold CI 0.75 | Threshold CI 0.975 | Log Likelihood | AIC  | Bayes Factor (w.r.t. proportional model) | Bayes Factor (w.r.t. Constant model) |
|----------------------------------------|---------|------------|---------------------------------|-----------------------------------|--------------------|-------------------|------------------|-------------------|--------------------|----------------|------|------------------------------------------|--------------------------------------|
| Eriksson no equatorials                | 119     | 9769332    | 29.92                           | 15.31                             | 6.67               | 11.16             | 13.18            | 14.80             | 17.00              | -1403          | 2811 | 1.62E+05                                 | 2.00E+27                             |
| Eriksson no equatorials exact direct   | 55      | 9769332    | 30.25                           | 15.31                             | 7.95               | 11.69             | 14.50            | 15.98             | 17.89              | -679           | 1365 | 2.23E+05                                 | 3.43E+17                             |
| Timmermann no equatorials              | 97      | 213207     | 25.02                           | 18.04                             | 13.80              | 16.73             | 18.50            | 20.36             | 22.15              | -823           | 1652 | 4.33E+06                                 | 7.60E+08                             |
| Timmermann no equatorials exact direct | 46      | 213207     | 25.00                           | 18.04                             | 0.85               | 10.92             | 15.14            | 18.66             | 22.86              | -424           | 854  | 4.34E+01                                 | 2.58E+04                             |
| Australia                              | 56      | 1223500    | 30.25                           | 21.50                             | 13.22              | 19.22             | 27.08            | 28.07             | 28.99              | -592           | 1190 | 2.64E+04                                 | 1.67E+10                             |
| France-Spain                           | 31      | 240461     | 28.23                           | 26.60                             | 0.11               | 6.31              | 14.10            | 18.52             | 32.73              | -303           | 612  | 1.93E+01                                 | 2.44E+02                             |
| 0-9999 ya                              | 74      | 2672852    | 30.36                           | 19.92                             | 9.41               | 13.63             | 15.51            | 16.89             | 18.93              | -819           | 1644 | 7.91E+03                                 | 4.74E+13                             |
| 10000-46000ya                          | 45      | 7096480    | 27.19                           | 13.66                             | 1.07               | 4.26              | 5.87             | 7.74              | 14.14              | -559           | 1124 | 8.00E+01                                 | 4.95E+10                             |
